# Supplementary material for: Biotransformation of Cortisone with Rhodococcus rhodnii: Synthesis of New Steroids
Source: PubMed Central journal article supplement (PMC7962003; doi:10.3390/molecules26051352), 2021-03-03
Supplement: molecules-26-01352-s001.pdf [file molecules-26-01352-s001.pdf]

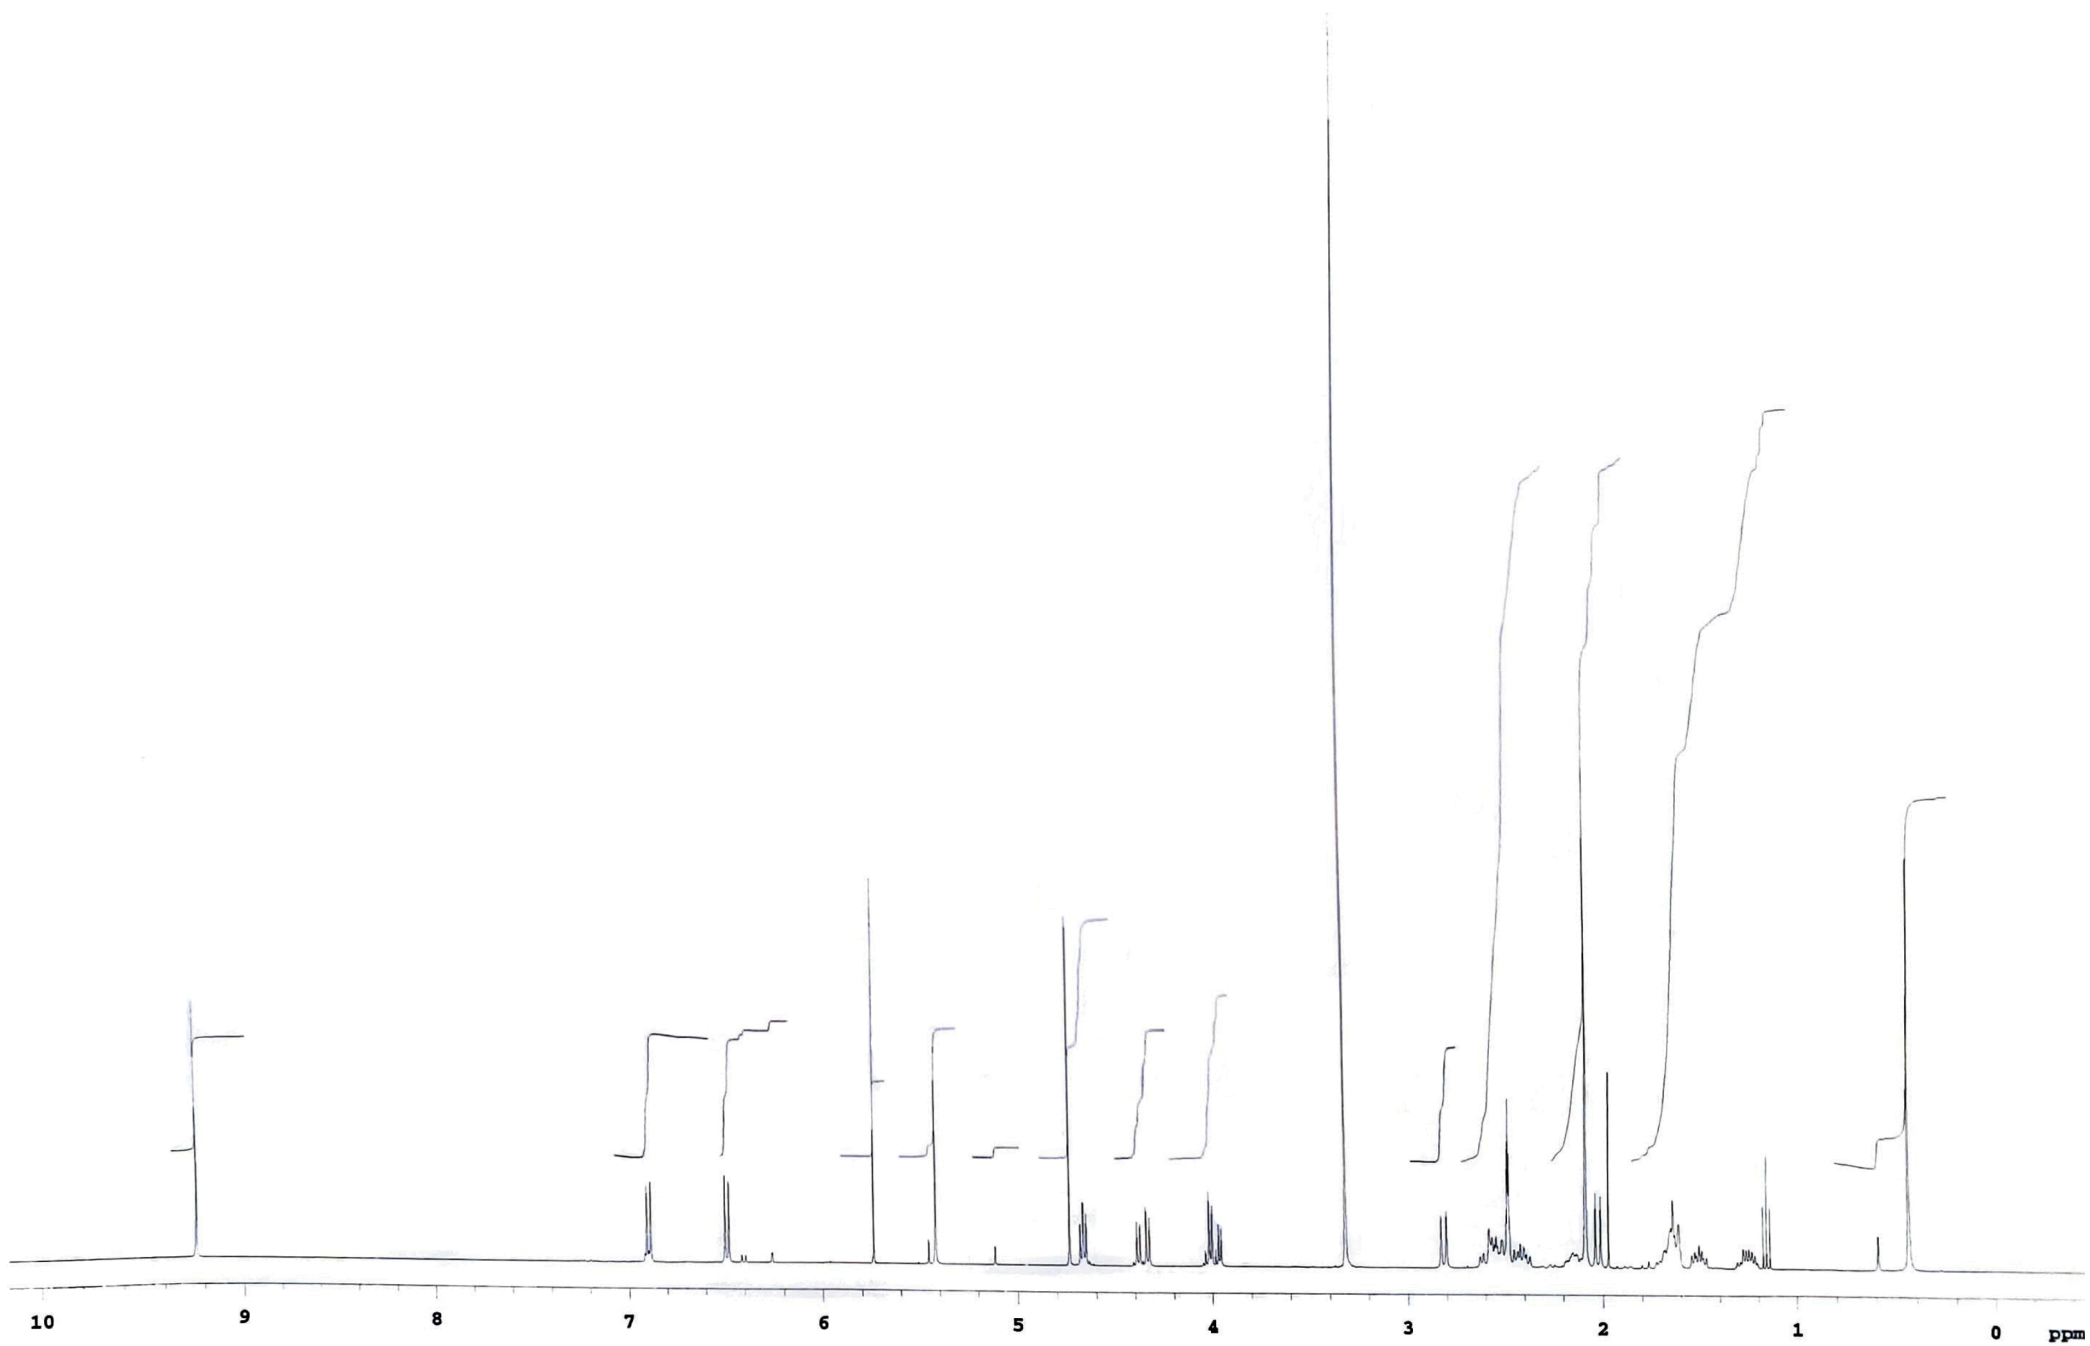

1H-NMR product 6

Fantin

Data Collected on:  
nmr400-mercury400  
Archive directory:  
/export/home/vnmr2/vnmrsws/data  
Sample directory:

File: CARBON

Pulse Sequence: s2pul  
Solvent: DMSO

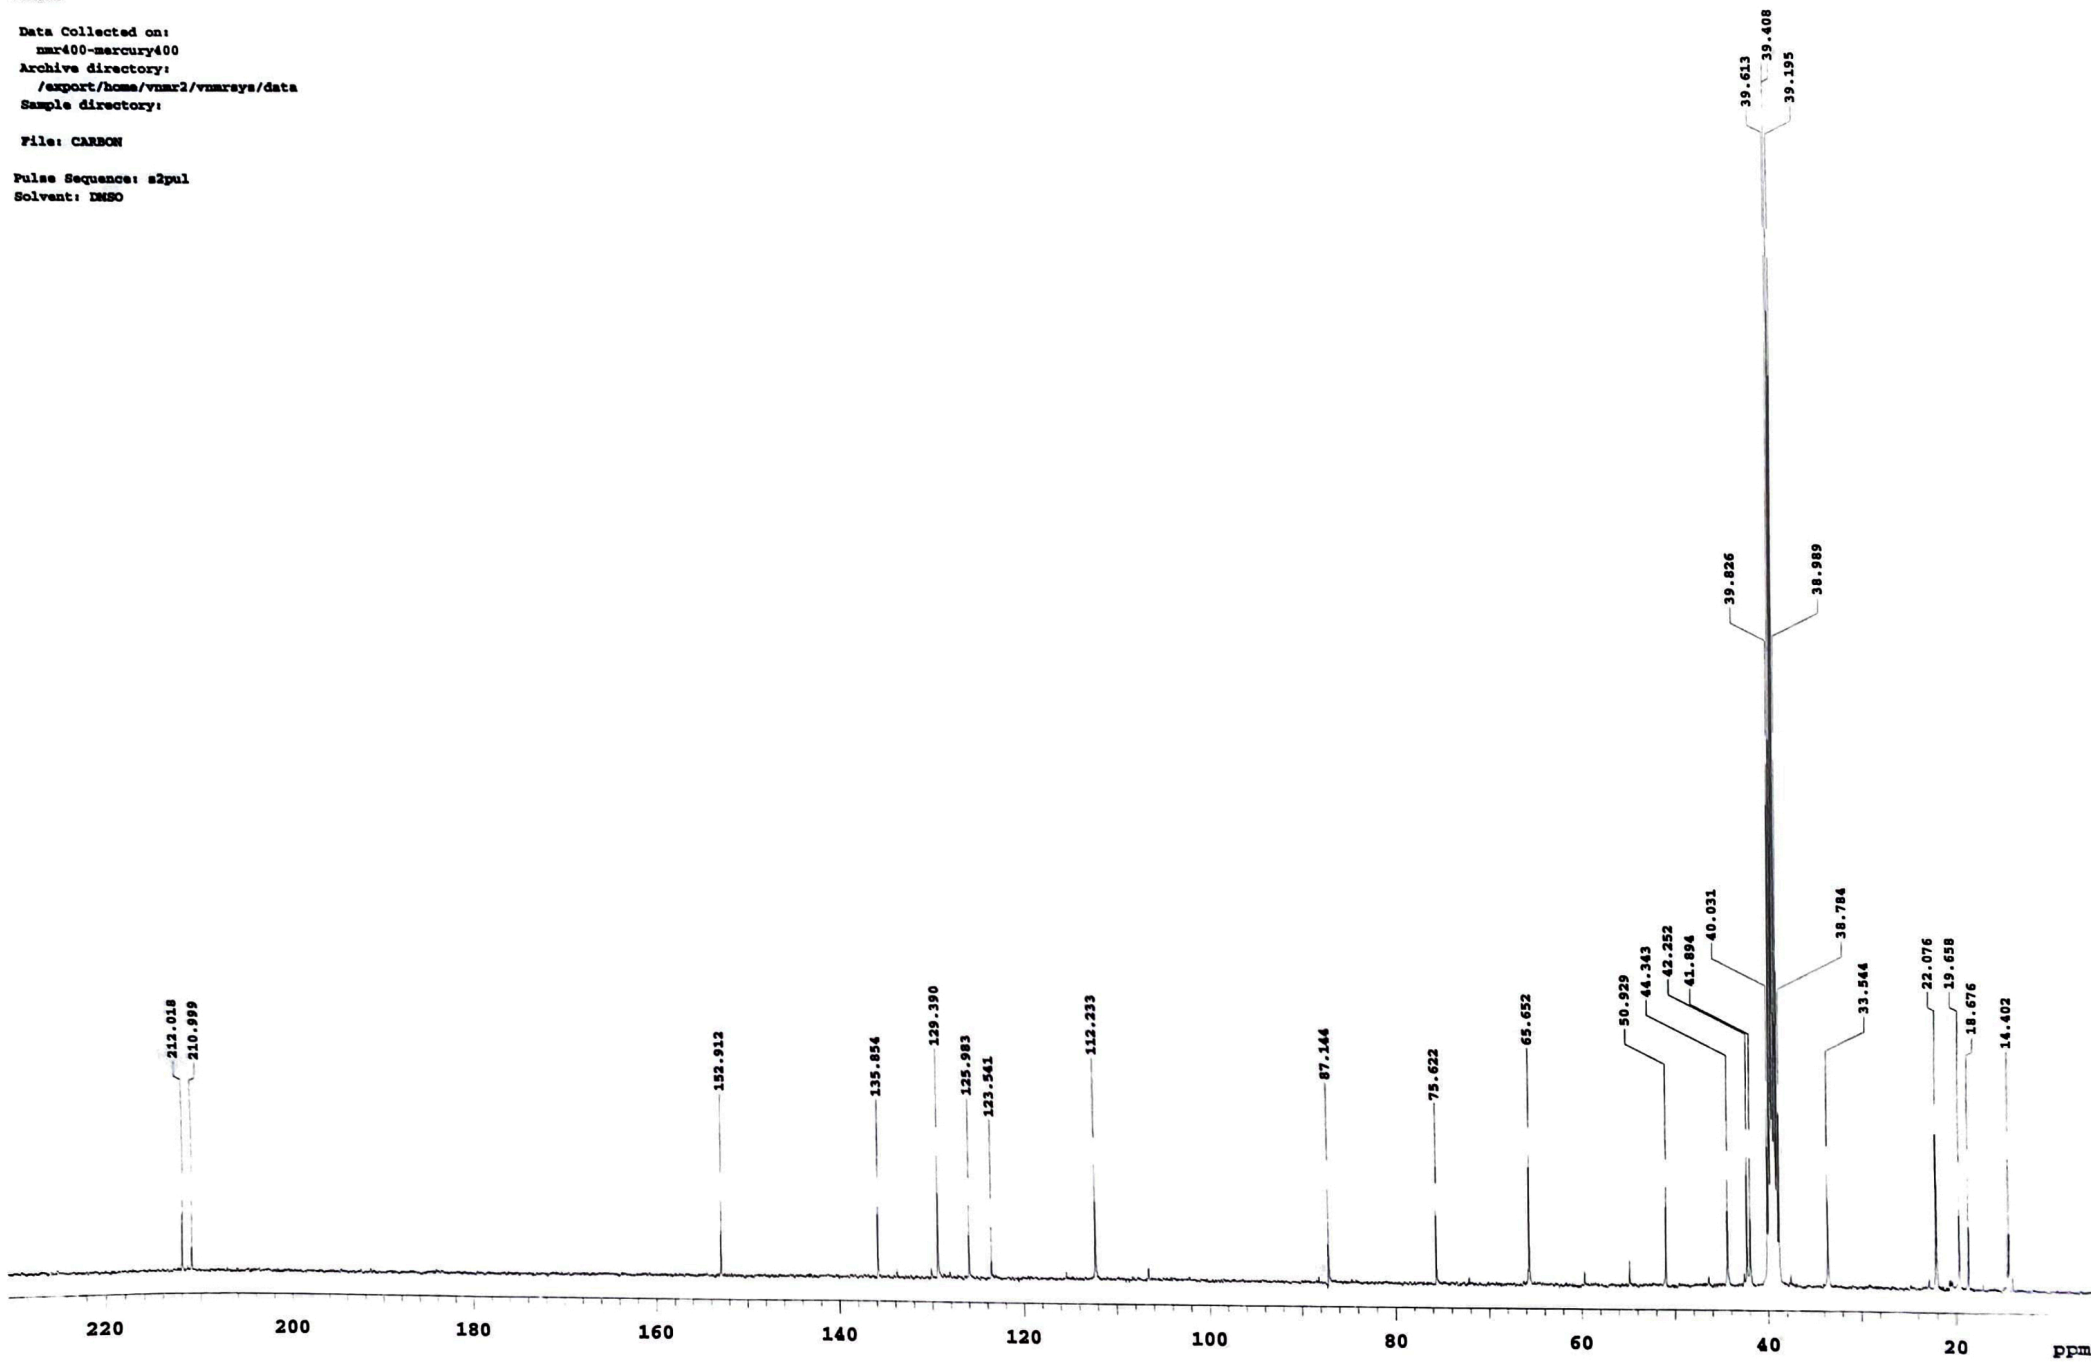

<sup>13</sup>C-NMR product 6

SCA

Sample Name:  
bbnew\_calib  
Data Collected on:  
nmr400.unife.it-mercury400  
Archive directory:  
/home/vnmr1/vnmrSYS/data  
Sample directory:  
/home/vnmr1/vnmrSYS/data  
FidFile: CARBON

Pulse Sequence: CARBON (s2pul)  
Solvent: dmsc  
Data collected on: Feb 3 2021

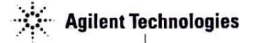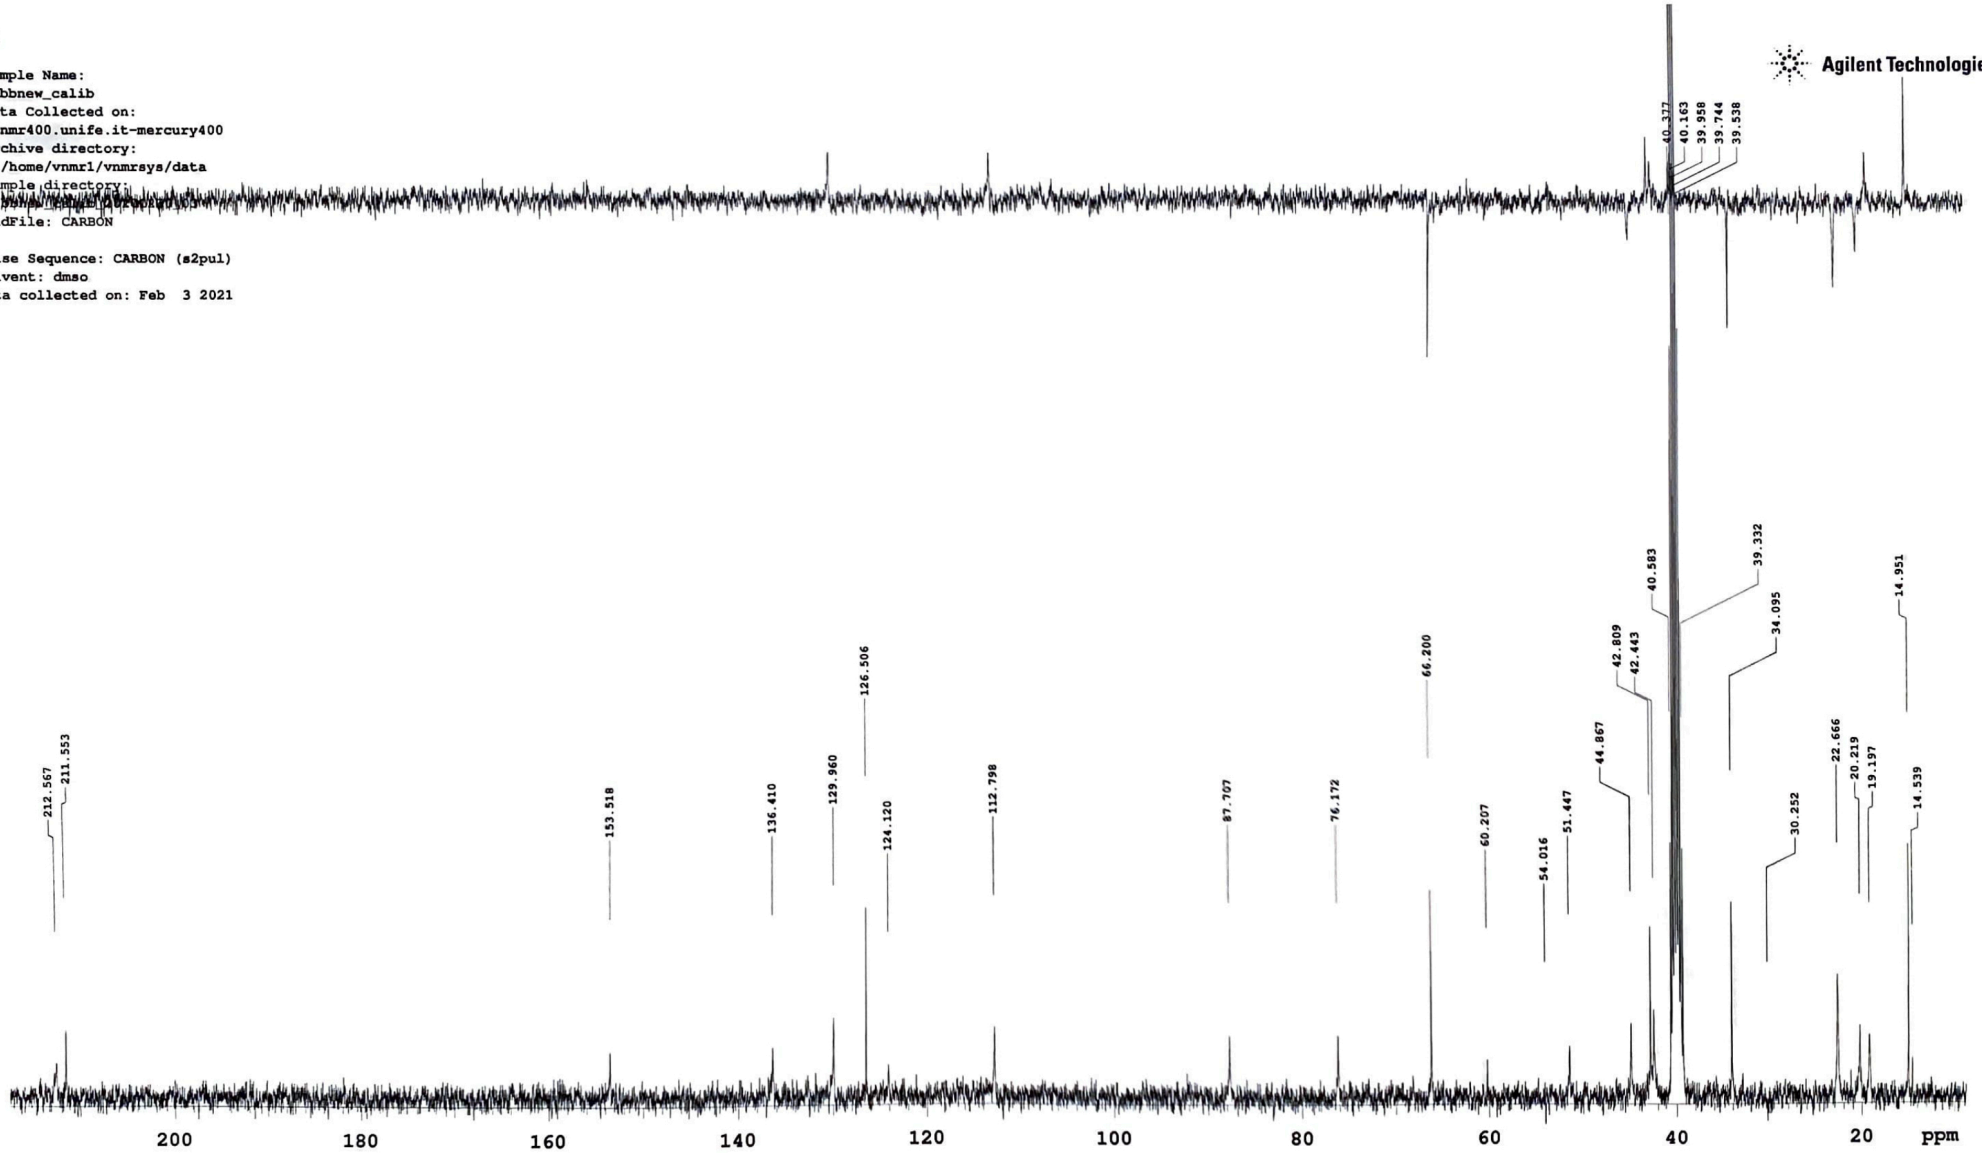

DEPT-NMR product 6

bbnew\_calib

Sample Name **bbnew\_calib**  
Date collected **2021-02-03**

Pulse sequence **gCOSY**  
Solvent **dmsd**

Temperature **25**  
Spectrometer **nmr400.unife.it-mercury400**

Study owner **vnmr1**  
Operator **vnmr1**

SCA

SAMPLE

date **Feb 3 2021**  
solvent **dmsd**  
sample **bbnew\_calib\_20**  
**210201\_01**

FLAGS

hs **nn**  
ssol **y**  
hsglvl **1104**

SPECIAL

temp **25.0**  
gain **22**  
spin **0**

ACQUISITION

sw **4081.6**  
af **0.150**  
np **1224**  
fb **2200**  
ss **32**  
dl **1.000**  
rl **1**

F2 PROCESSING

sb **-0.075**  
scs **not used**  
ln **2048**

2D ACQUISITION

sw1 **4081.6**  
nl **256**  
dl2 **0**

F1 PROCESSING

sb1 **-0.063**  
sbs1 **not used**  
proc1 **lp**  
ln1 **2048**

PRESATURATION

satmode **n**  
wet **n**

DISPLAY

sp **115.0**  
vp **3300.4**  
sp1 **31.3**  
vp1 **3515.6**  
rf **-19.3**  
rfp **0**  
rf1 **-19.3**  
rfp1 **0**

TRANSMITTER

tn **H1**  
sfreq **399.972**  
tcf **112.7**  
tpwr **60**  
pM **11.500**

GRADIENTS

gzME **924**  
glE **0.001000**  
EDirect **1.000**  
grtab **0.000500**

PLOT

wc **377.1**  
sc **0**  
wc2 **216.4**  
sc2 **9.8**  
vs **201**  
th **7**  
ai **odc av**

DECOUPLER

dl **C13**  
dl1 **nnn**

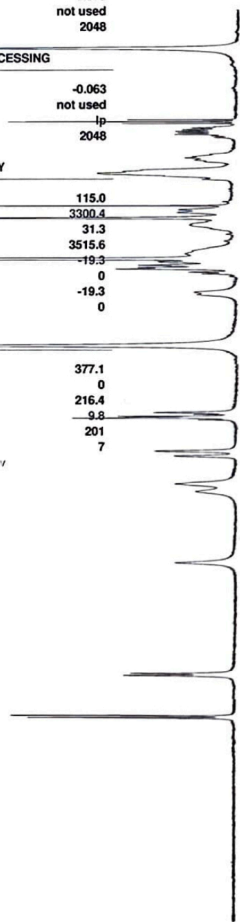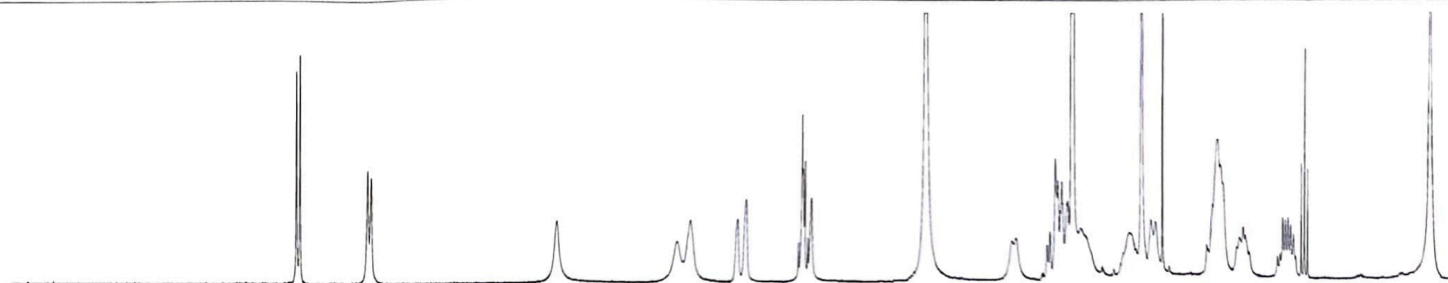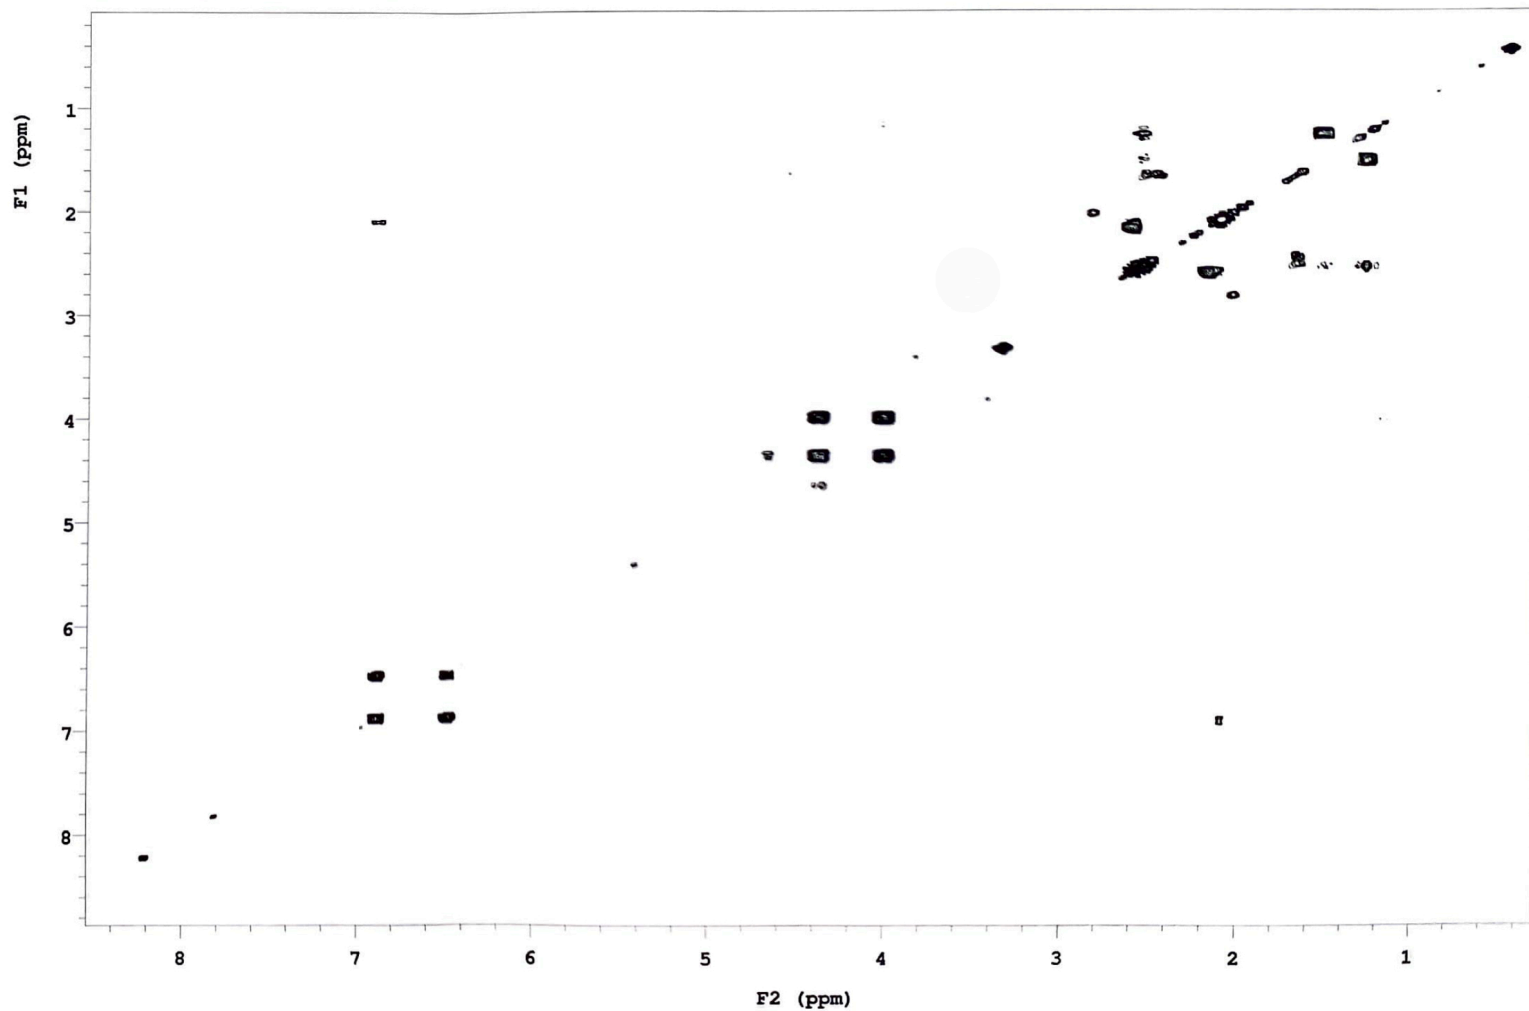

STANDARD IN OBSERVE

Data Collected on:  
nmr400-mercury400  
Archive directory:  
/export/home/vnmr2/vnmrsys/data  
Sample directory:

File: gcosy

Pulse Sequence: gcosy  
Solvent: DMSO

Relax. delay 1.000 sec  
Acq. time 0.136 sec  
Width 3759.4 Hz  
2D Width 3759.4 Hz  
Single scan  
2048 increments  
OBSERVE H1, 399.9701216 MHz  
DATA PROCESSING  
Sine bell 0.068 sec  
F1 DATA PROCESSING  
Sine bell 0.034 sec  
FT size 4096 x 4096  
Total time 1 hr

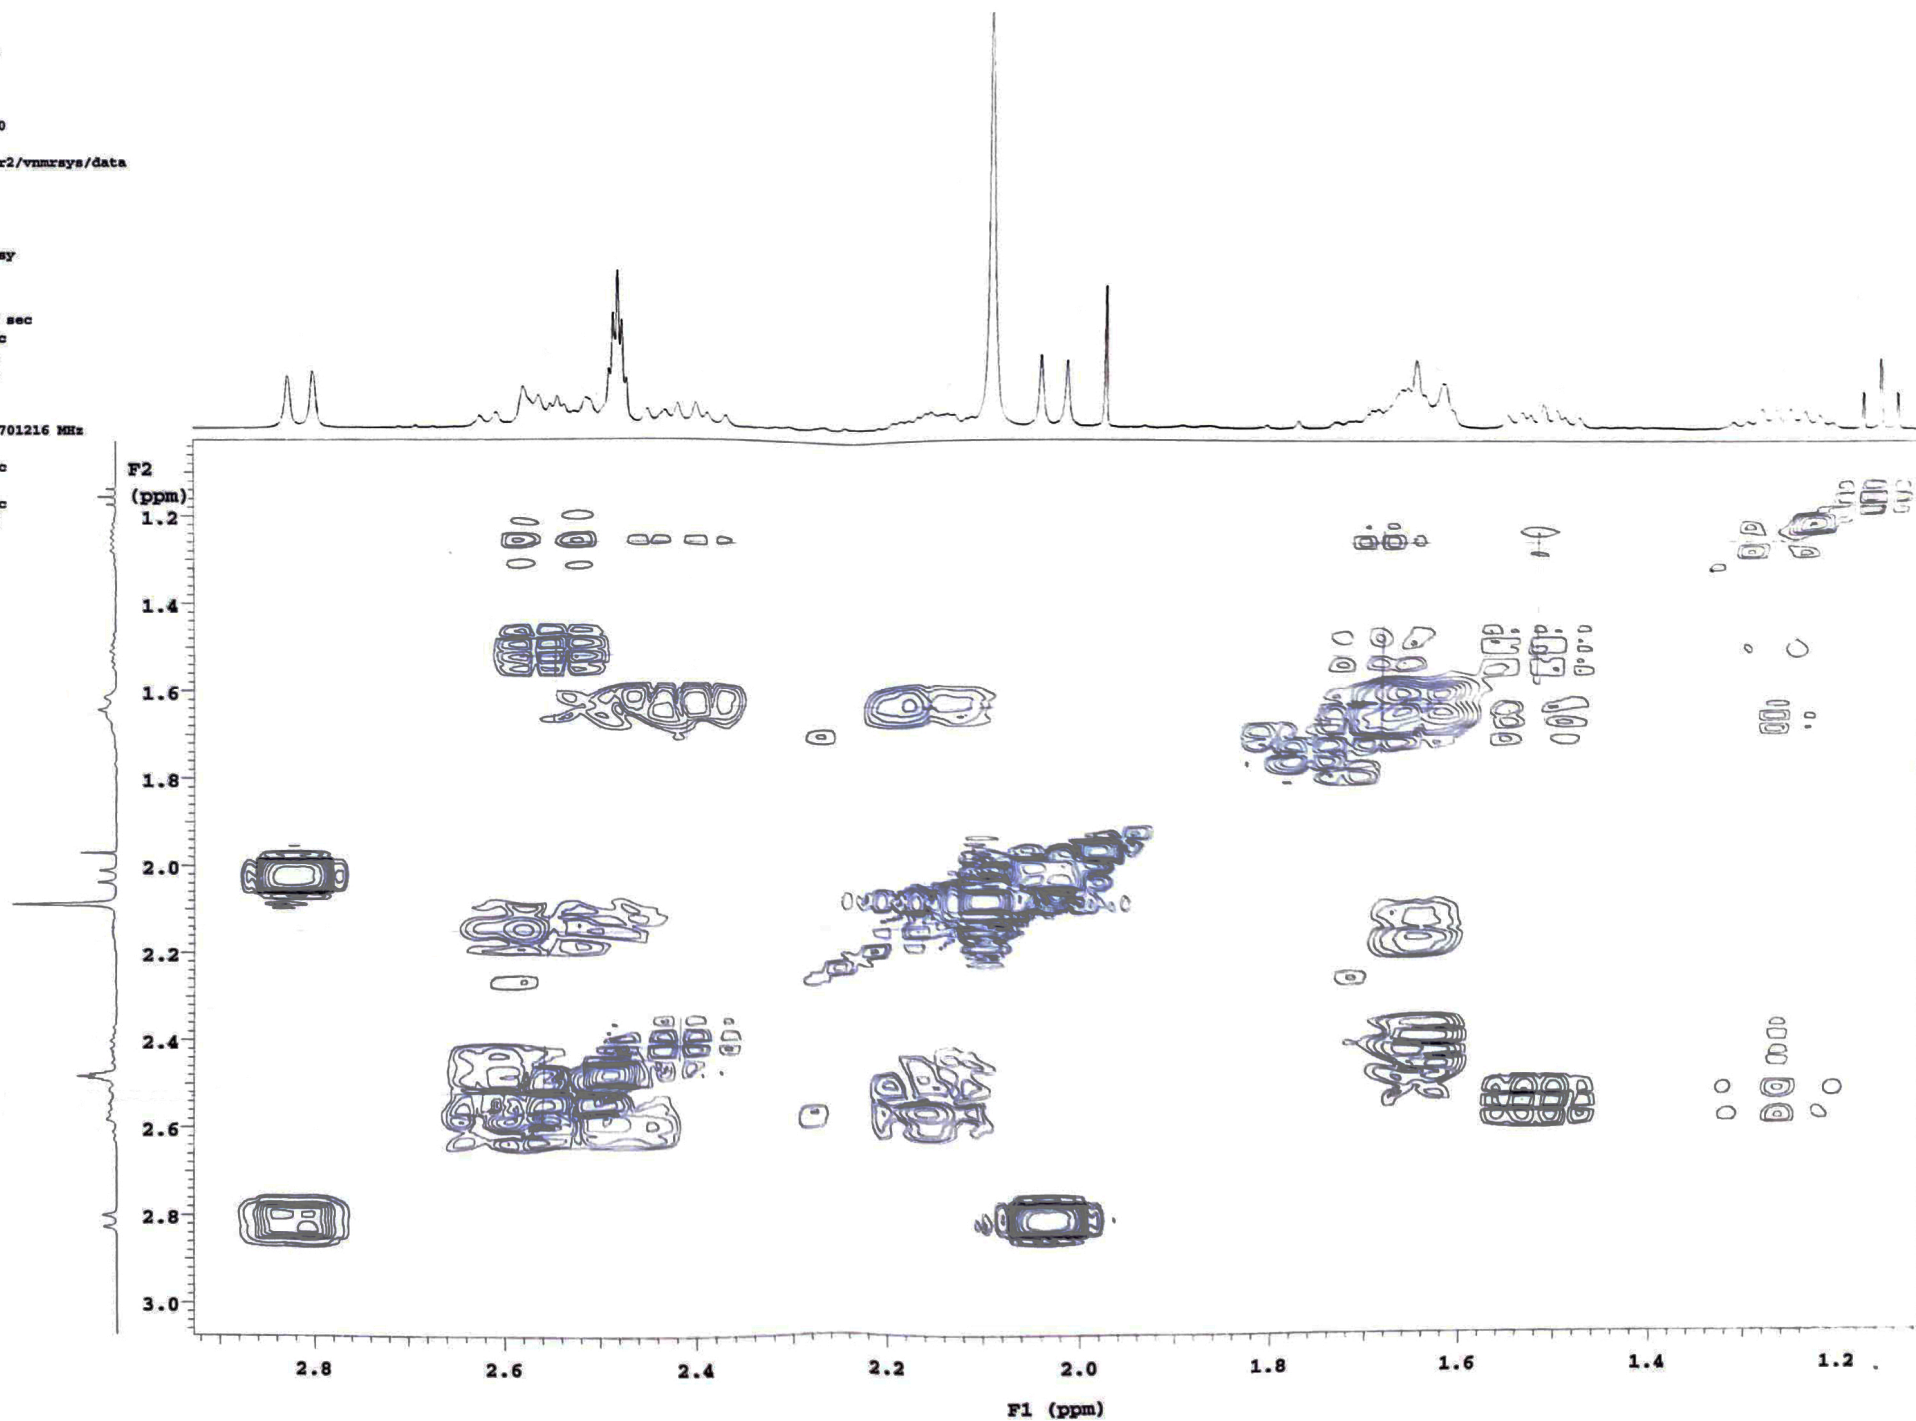

Focused COSY-NMR product 6

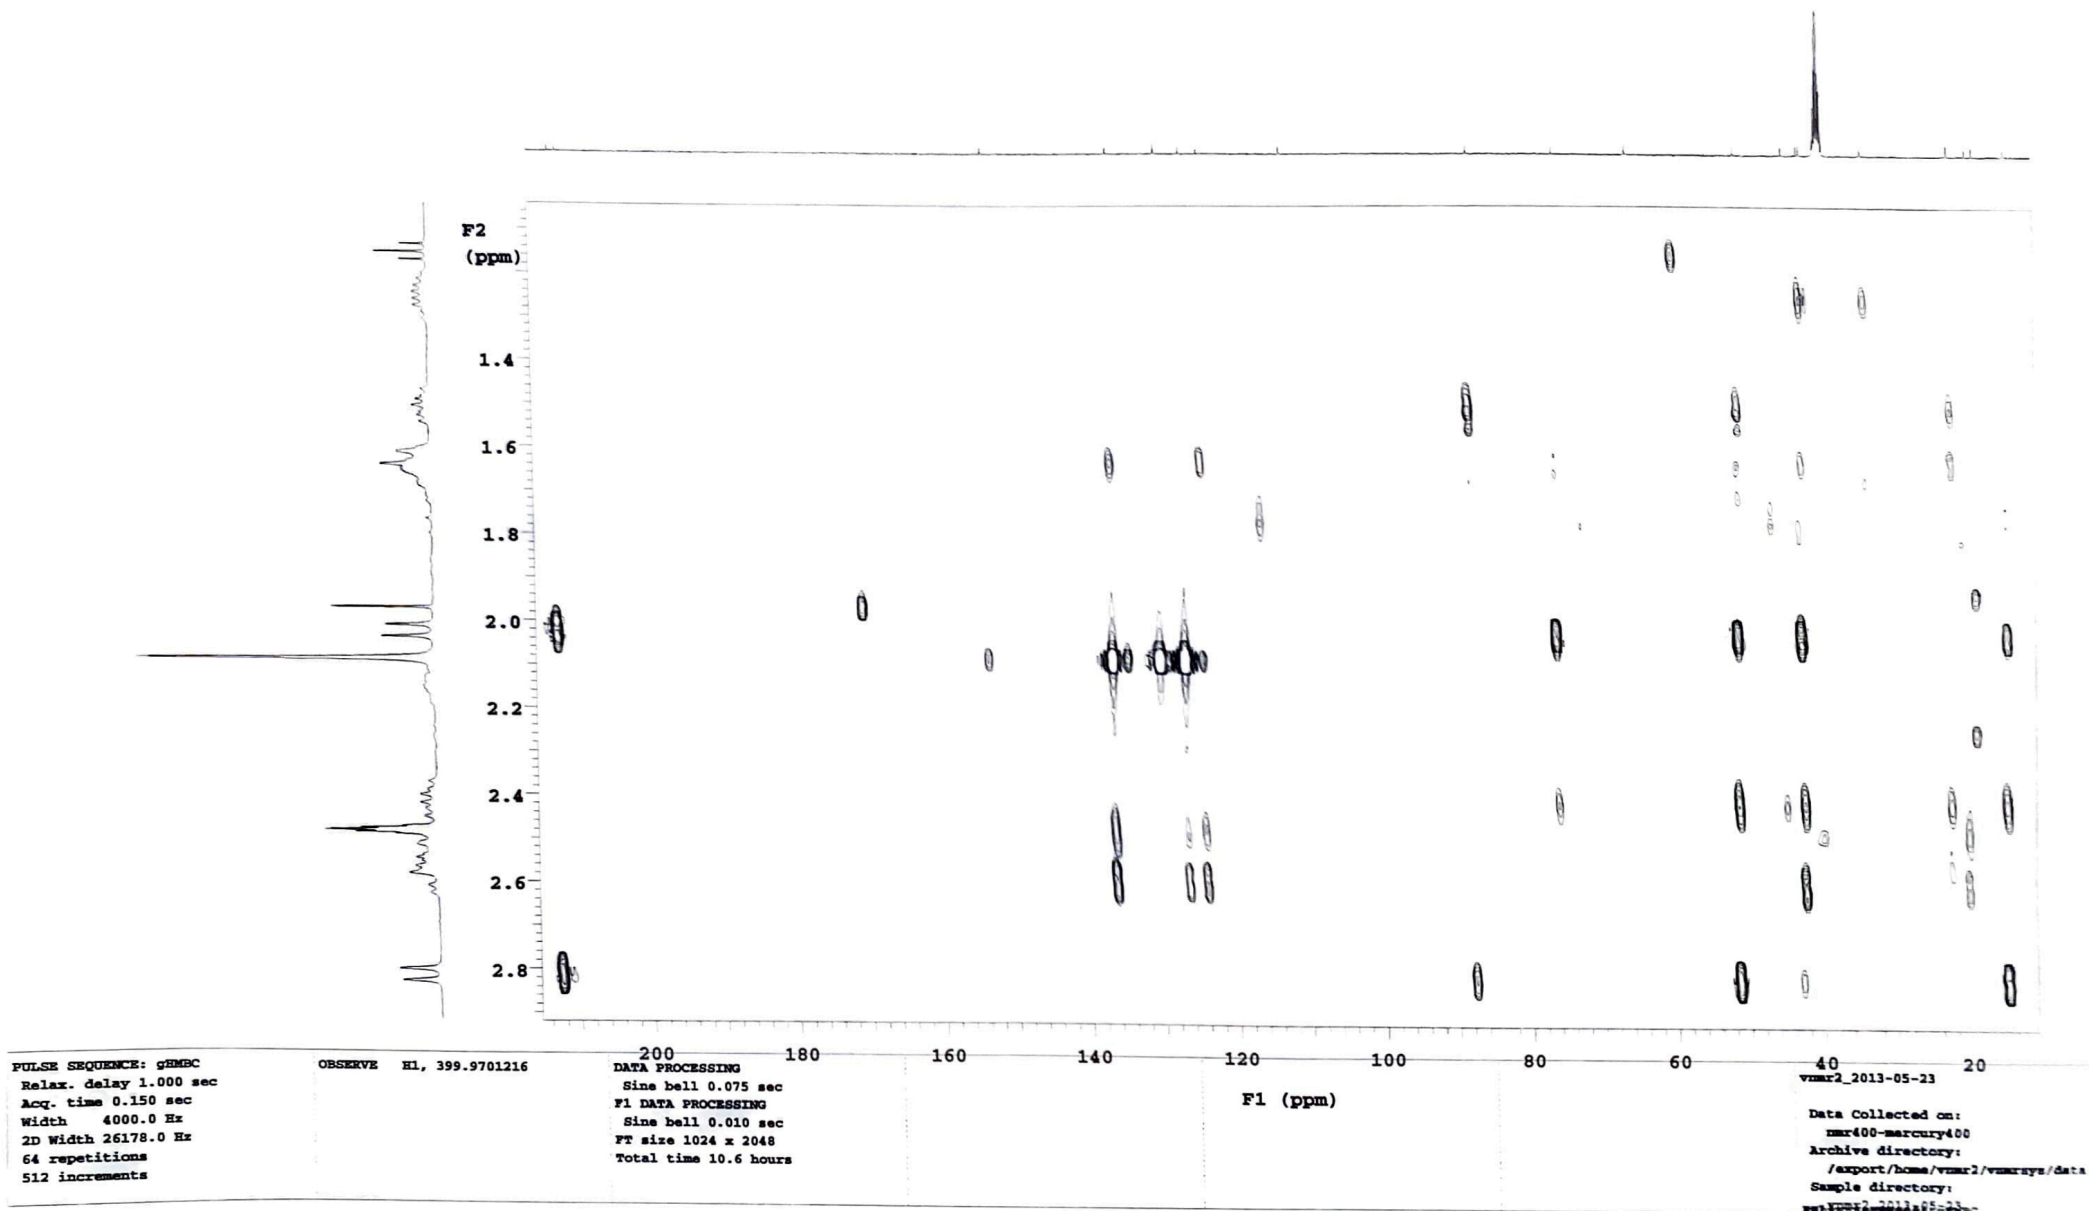

HMBC-NMR product 6

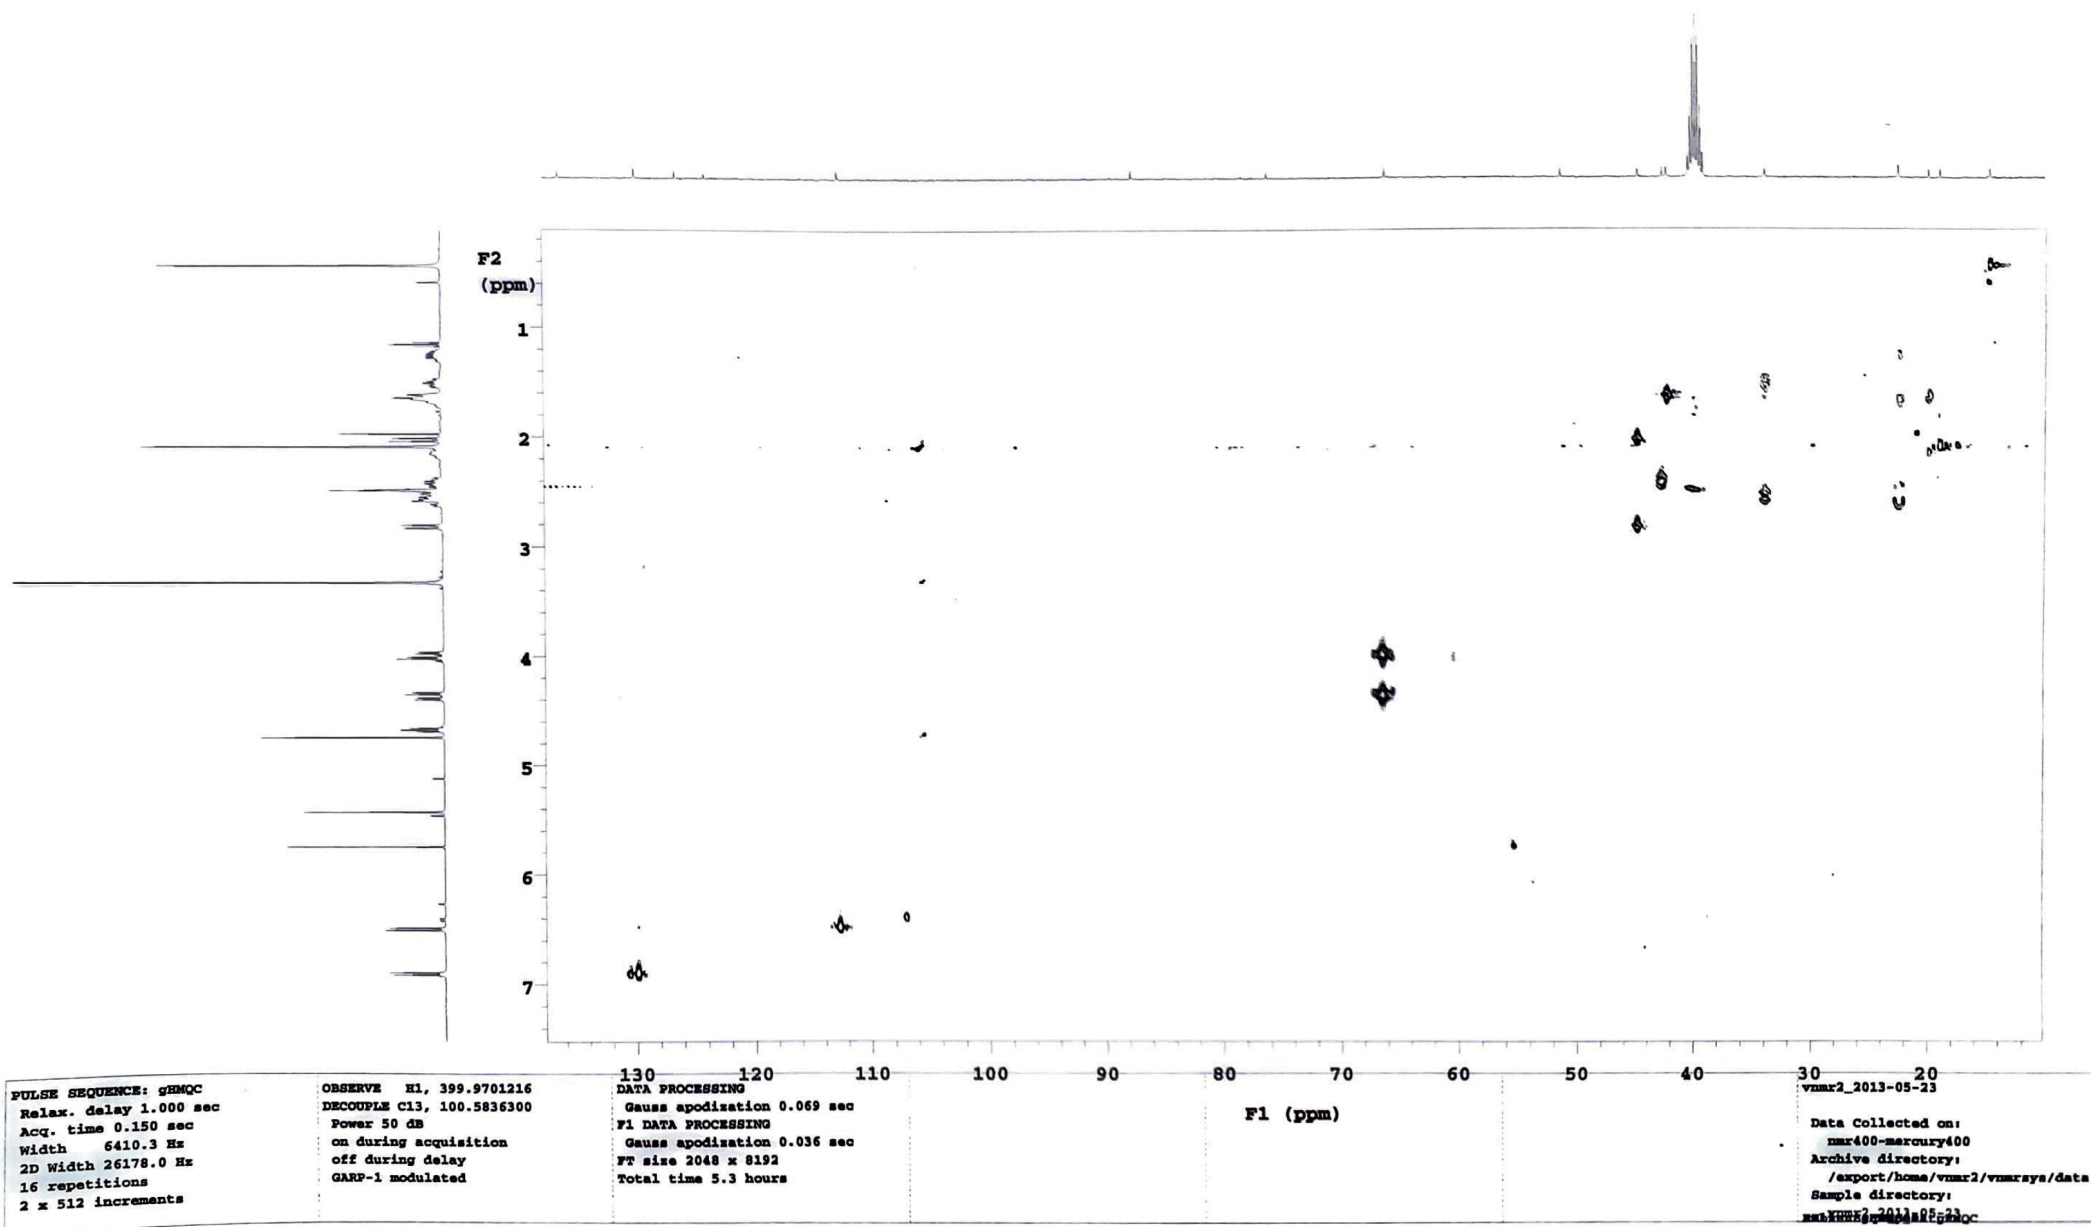

HMQC-NMR product 6

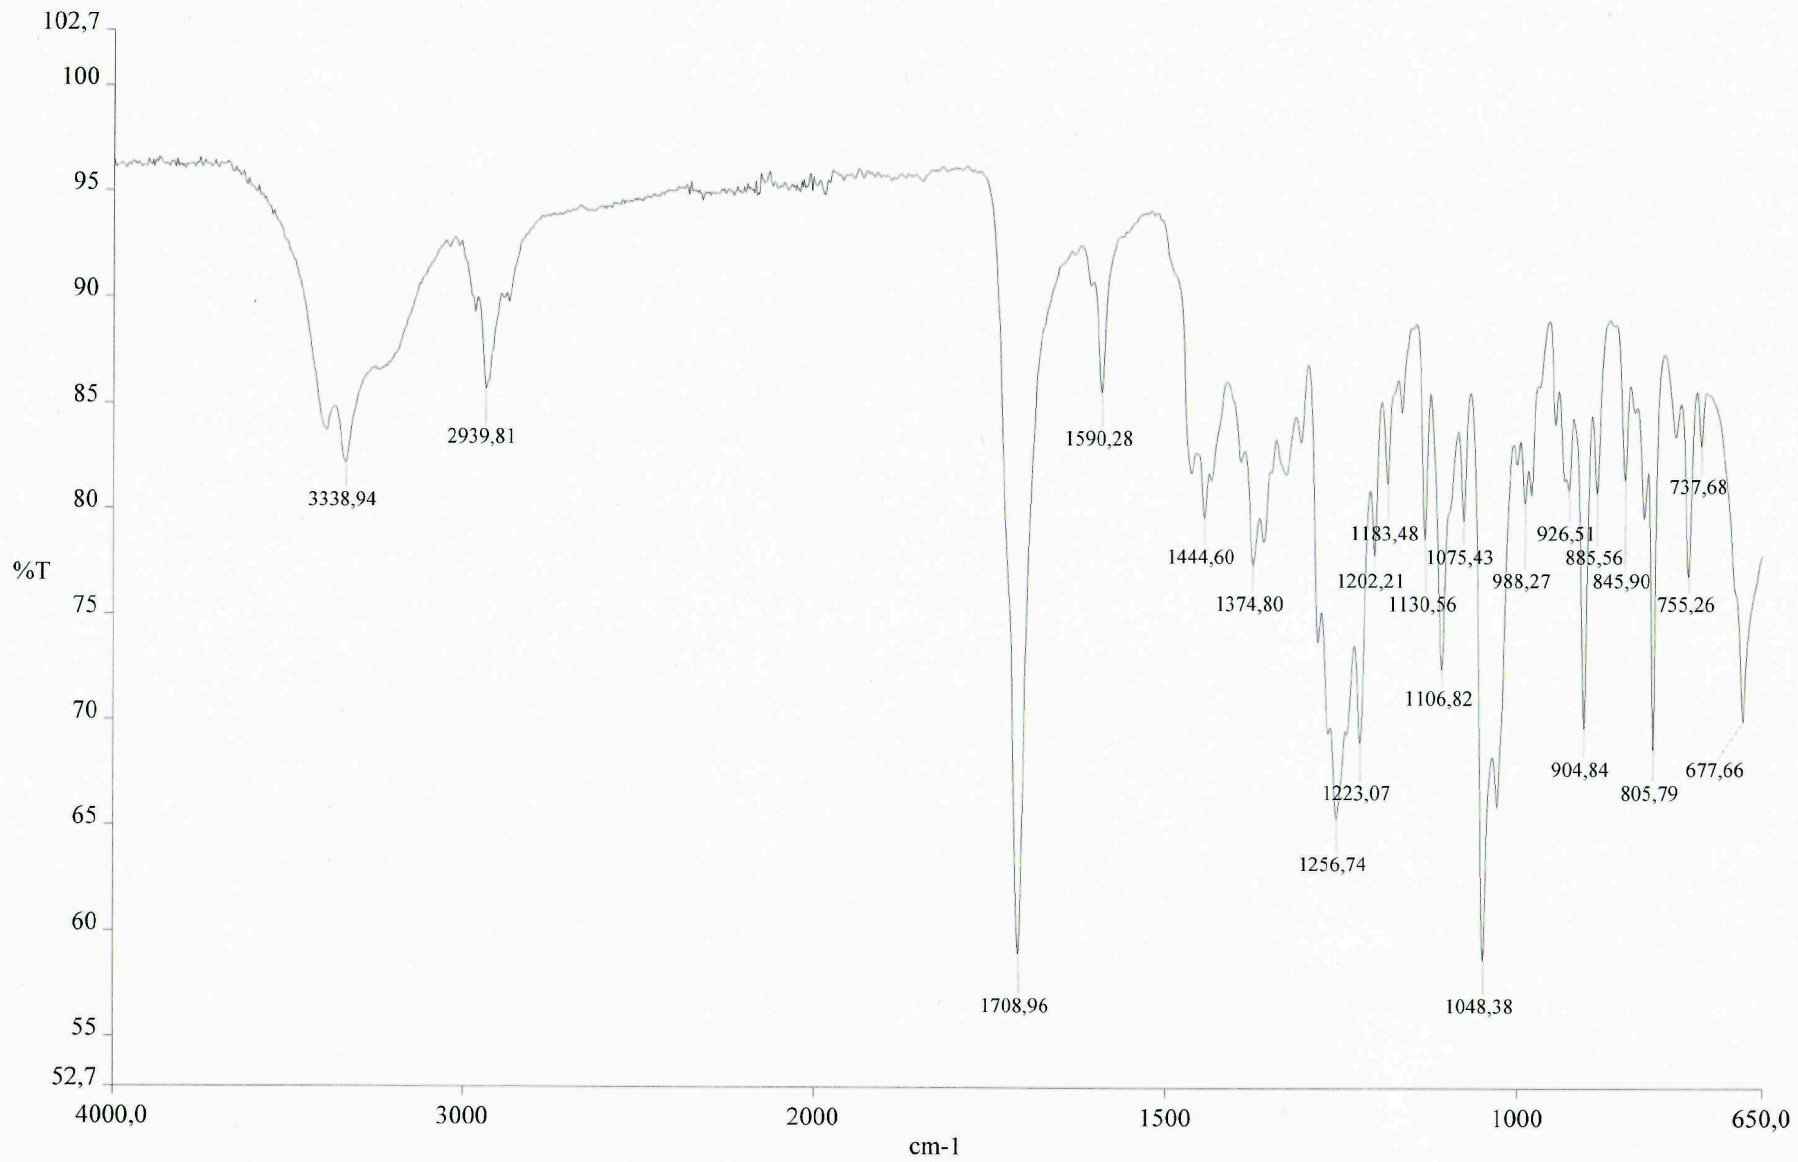

IR product 6



cortisone6 #124-167 RT: 3.53-4.75 AV: 44 NL: 2.87E6  
T: -p ESI Full ms [100.00-2000.00]

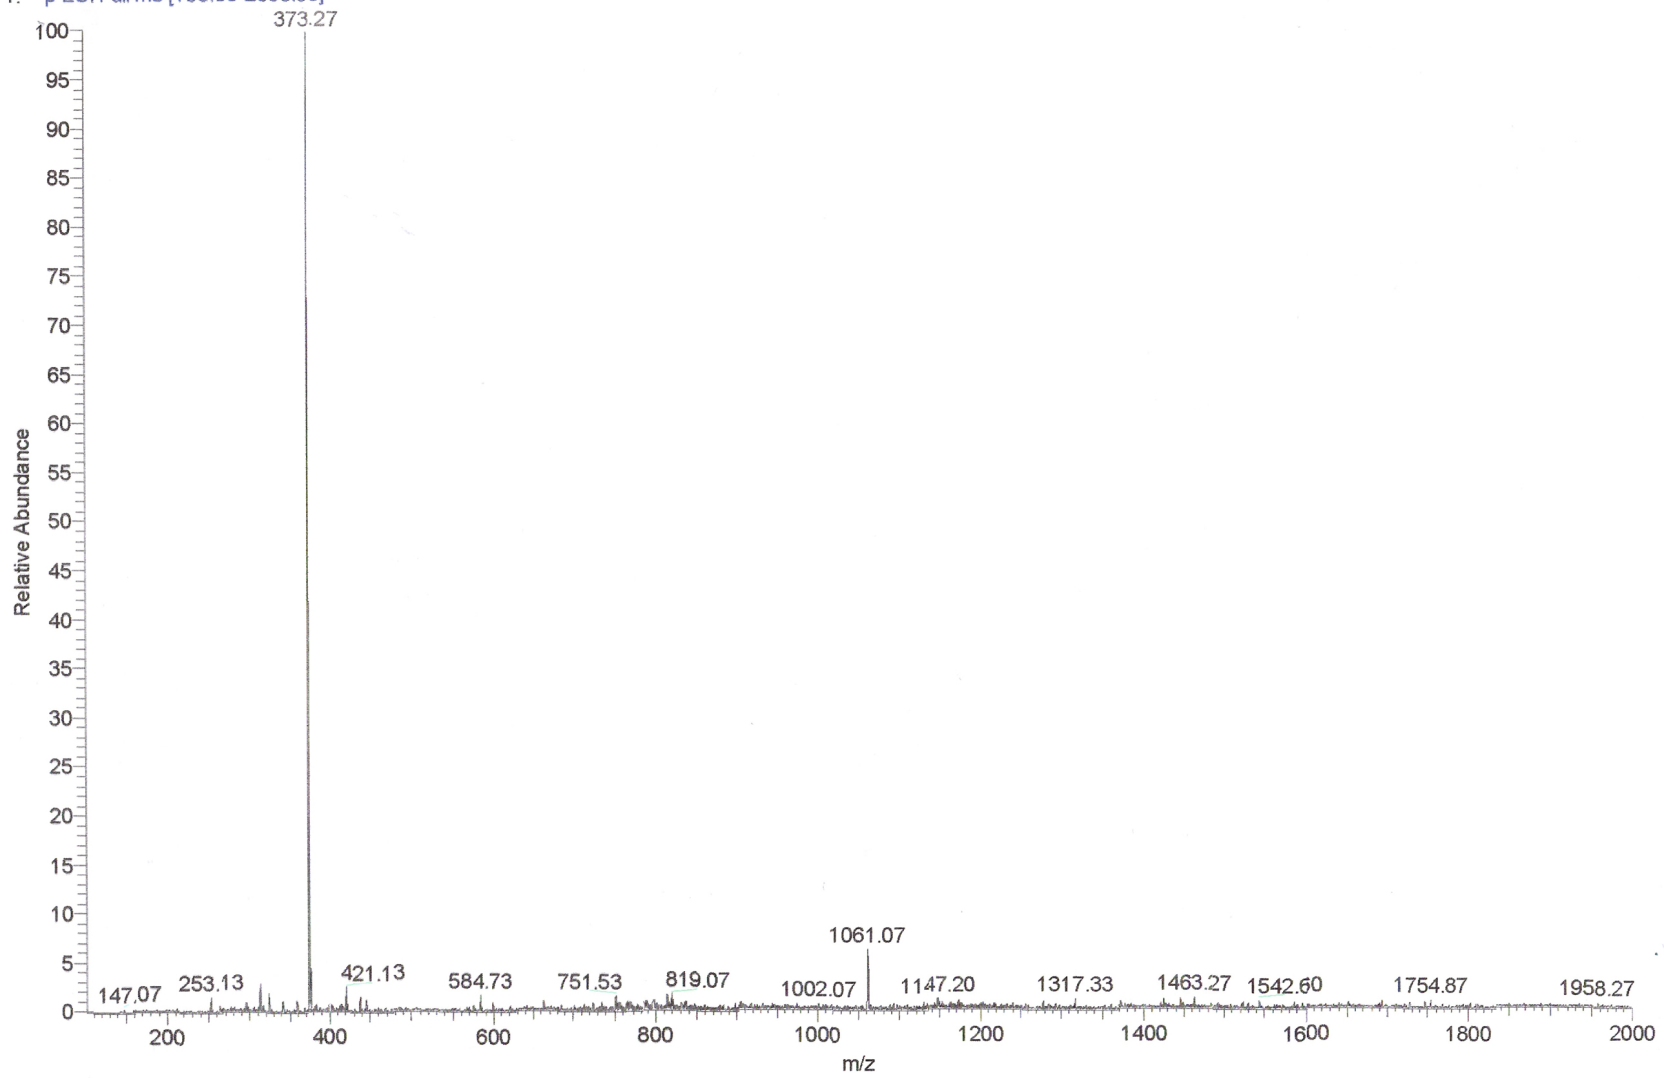

MS product 6

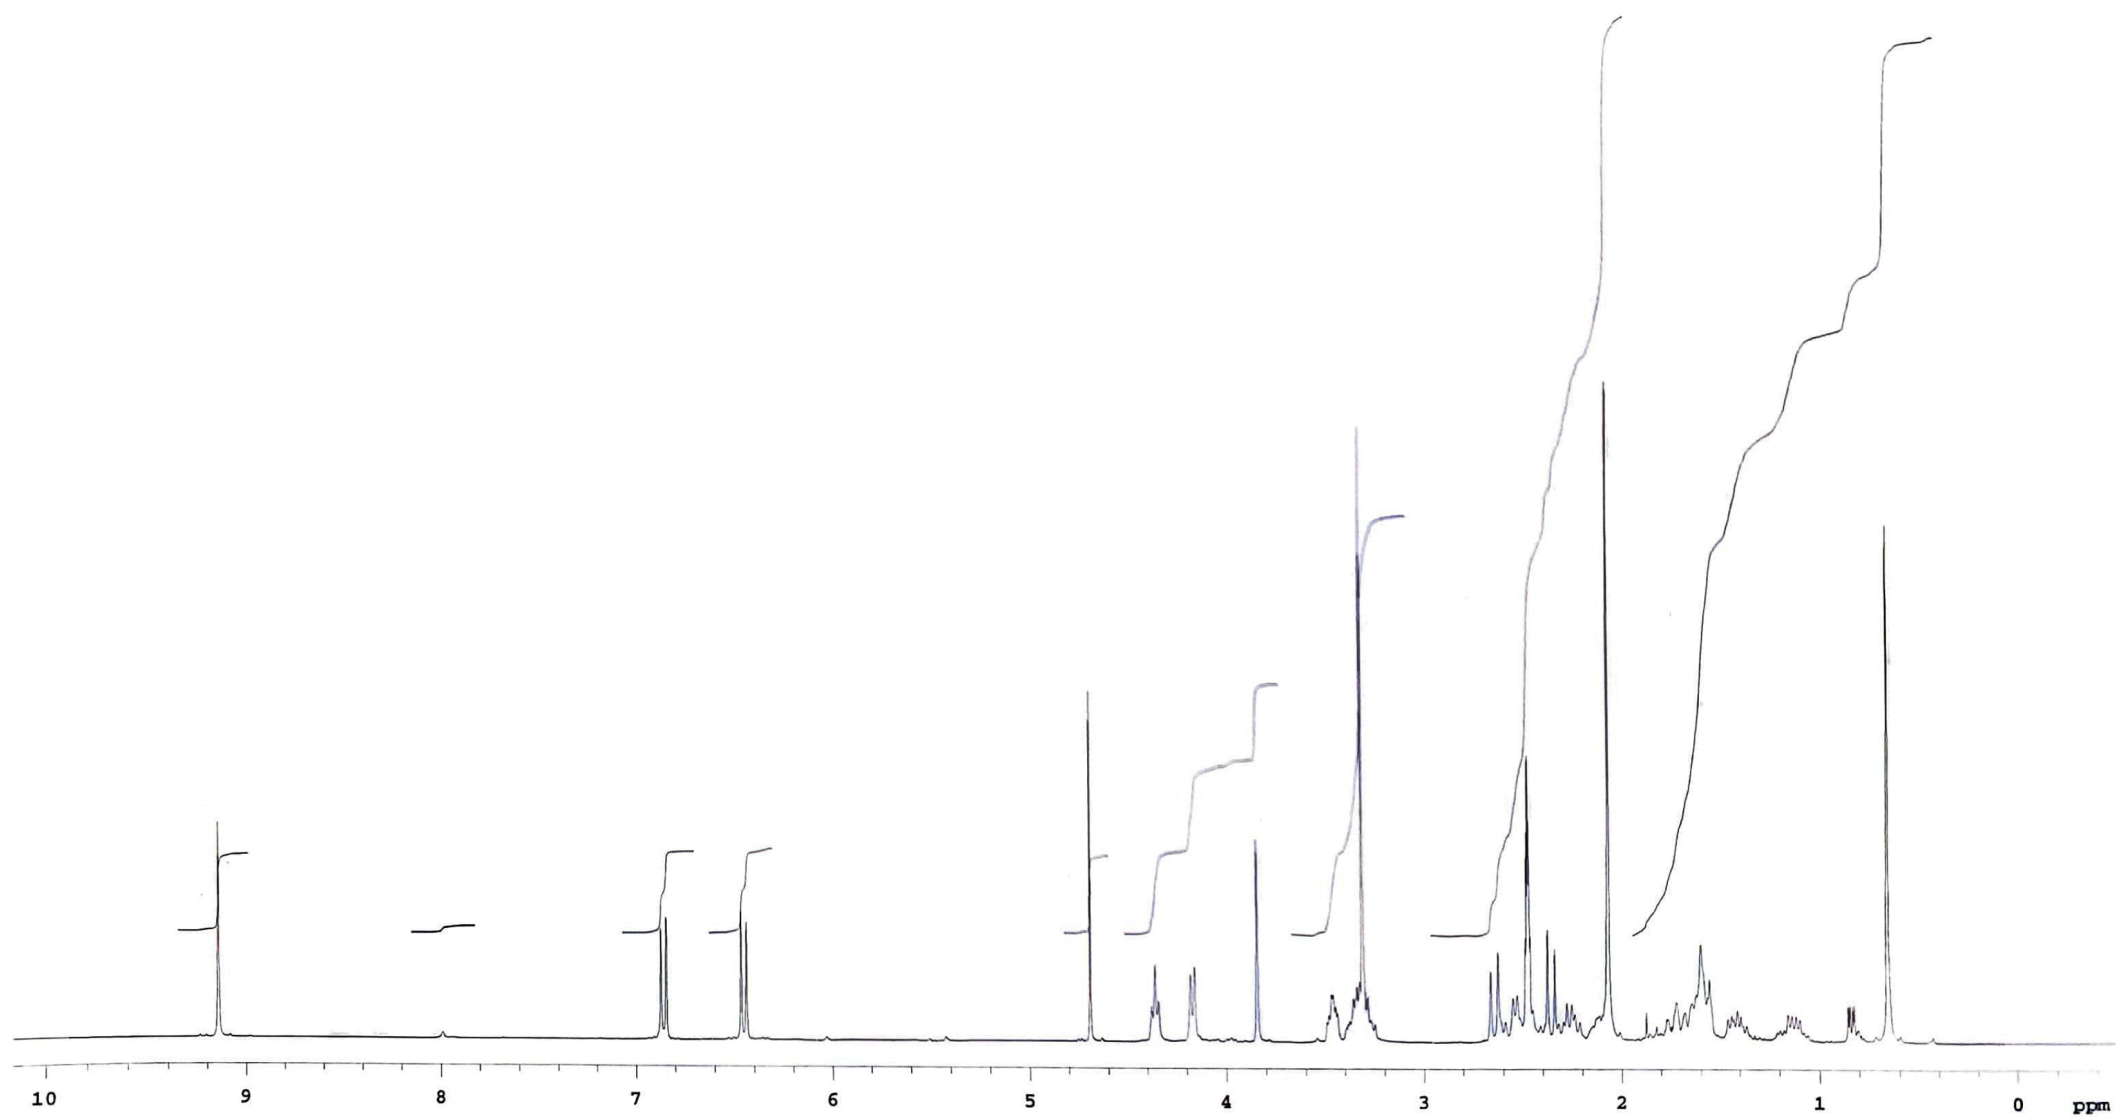

$^1\text{H-NMR}$  product 7

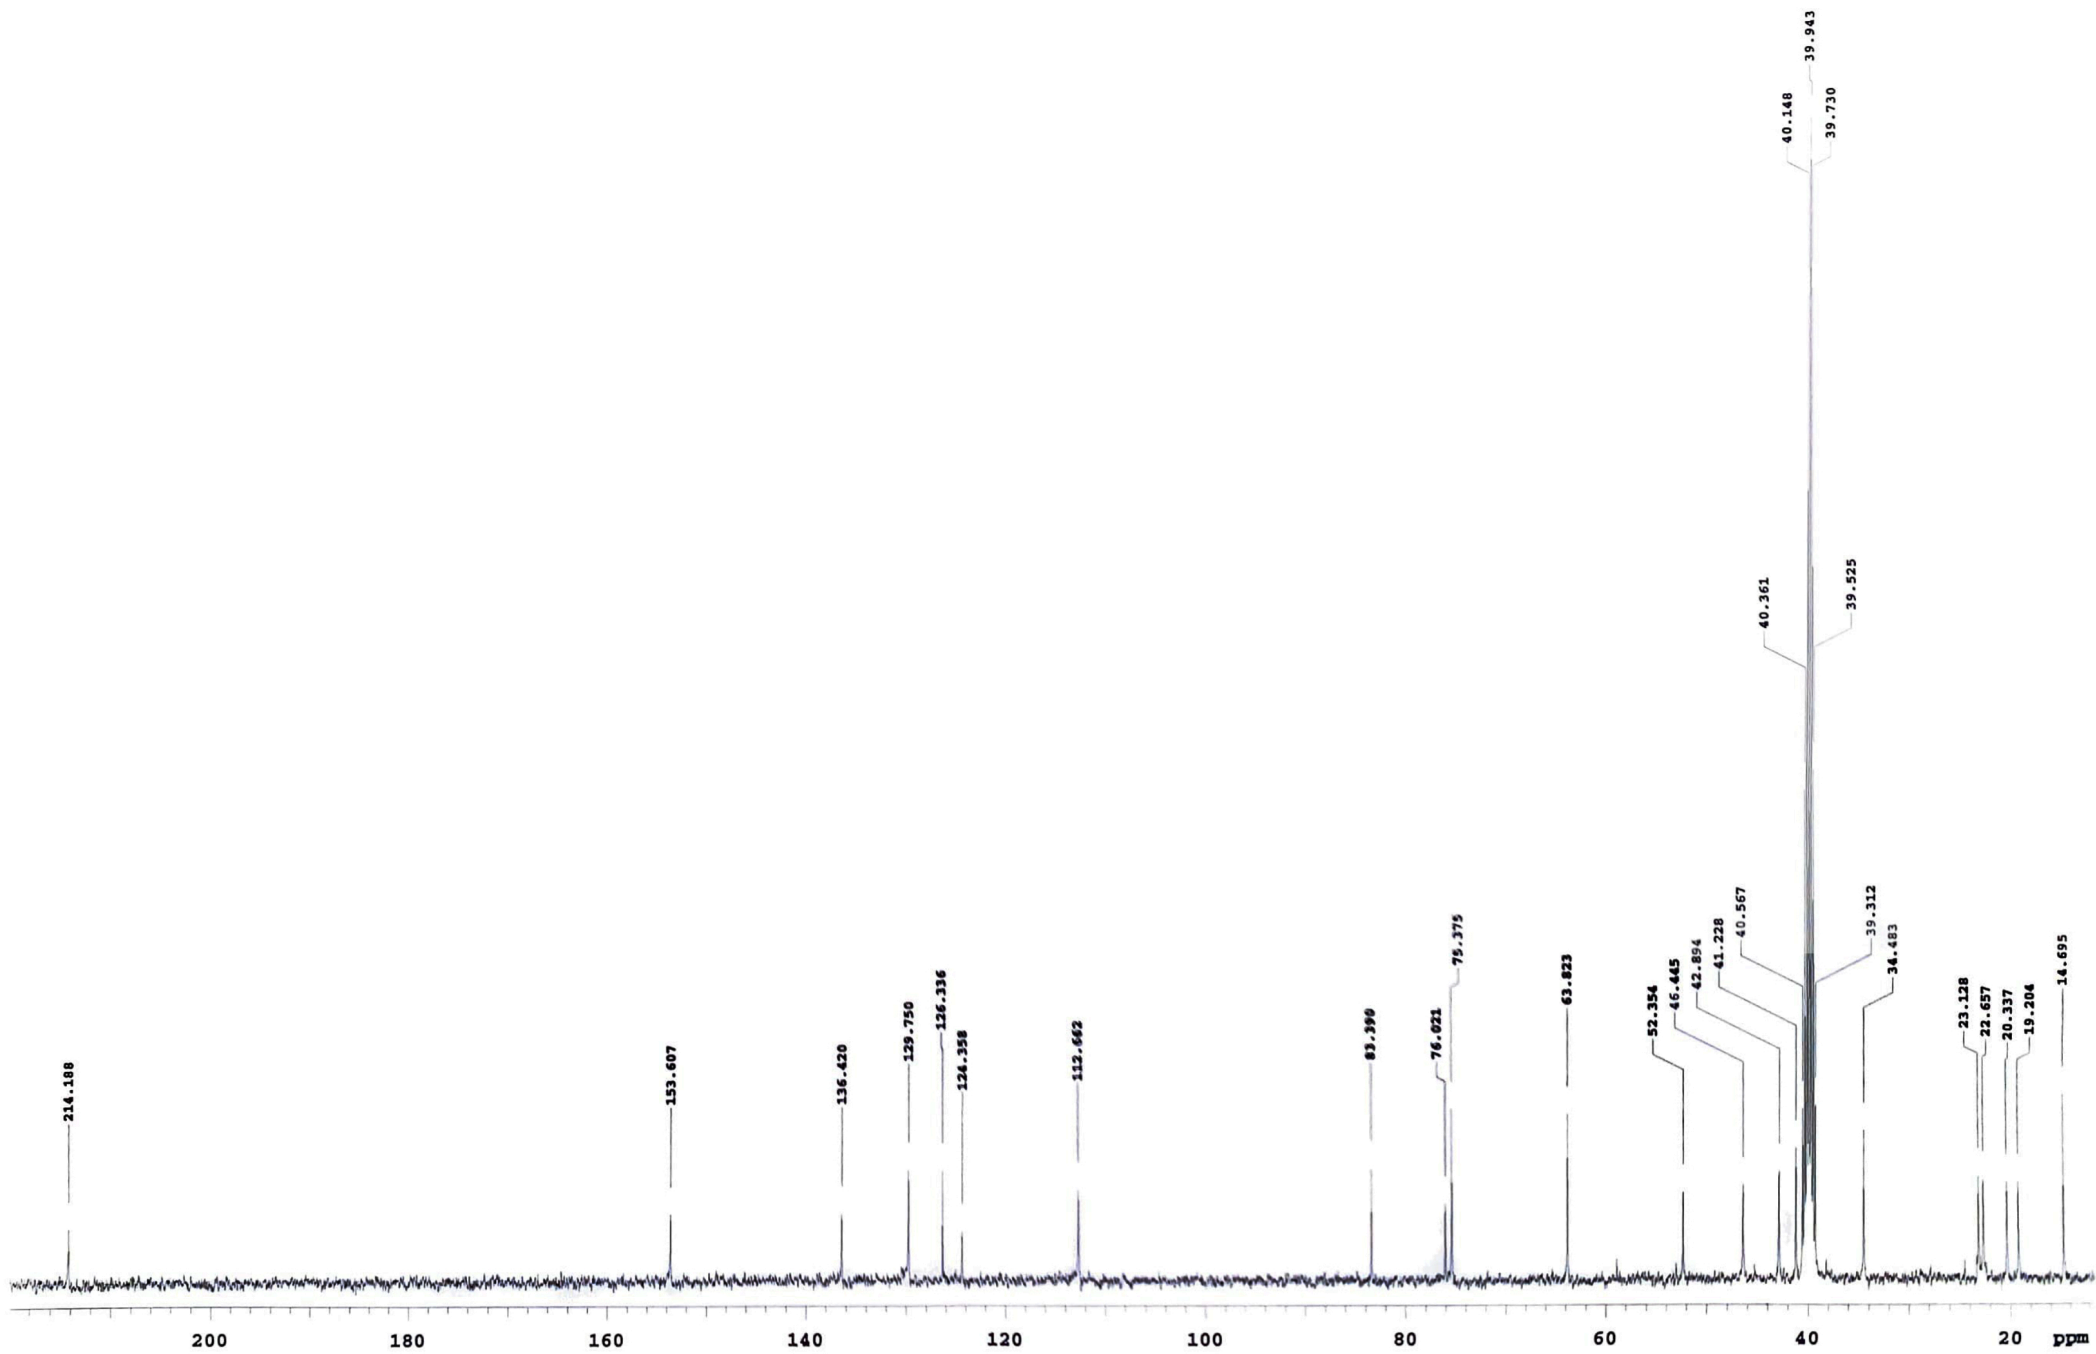

<sup>13</sup>C-NMR product 7

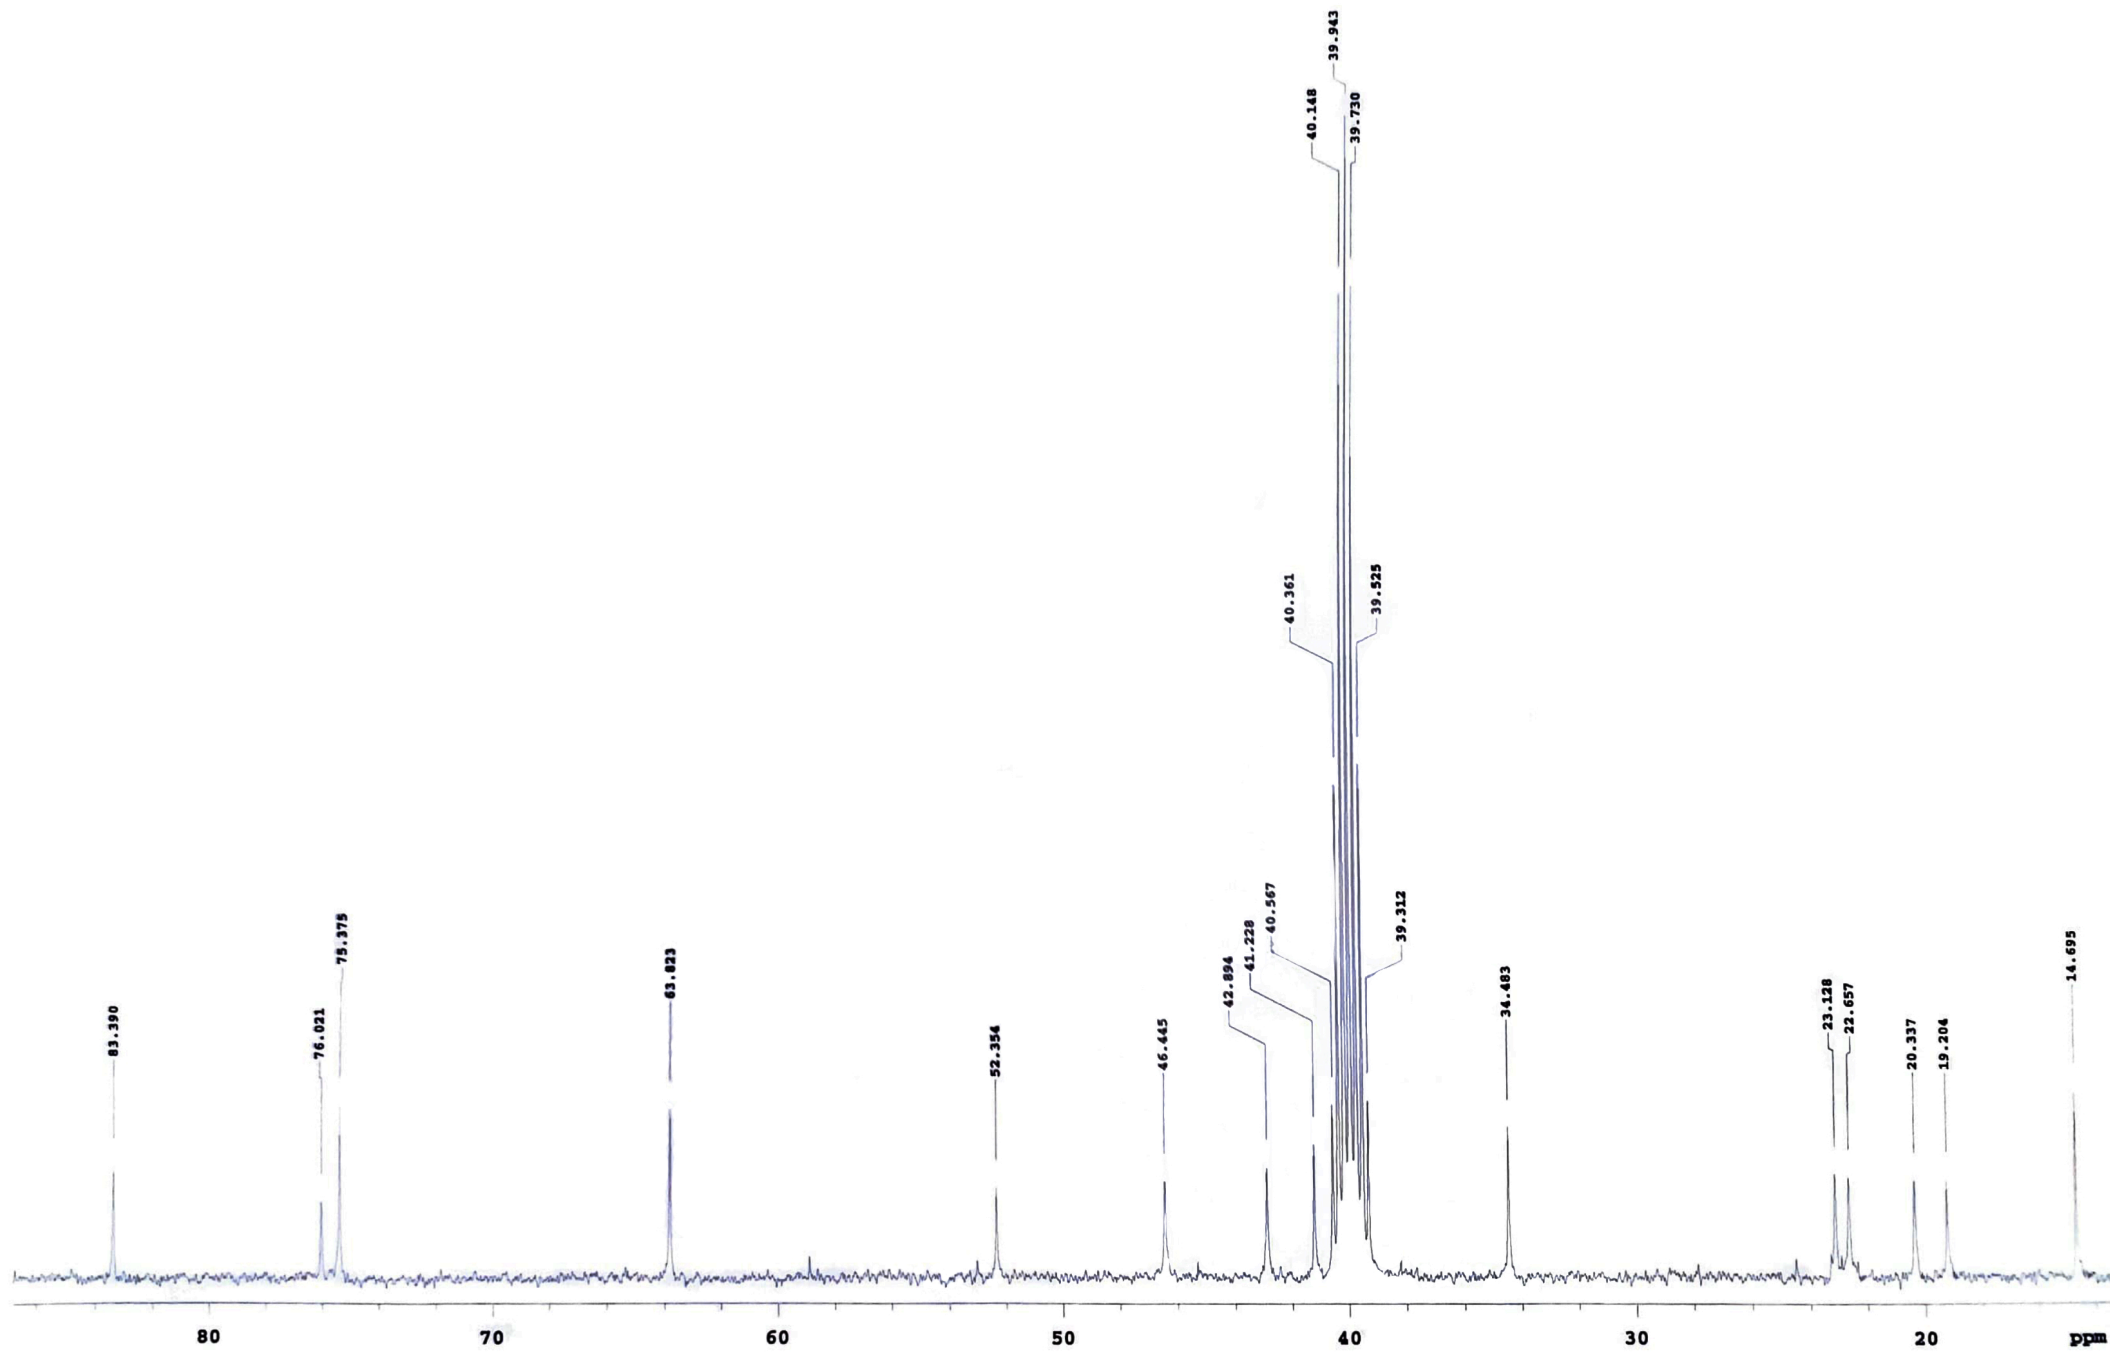

Focused  $^{13}\text{C}$ -NMR product 7

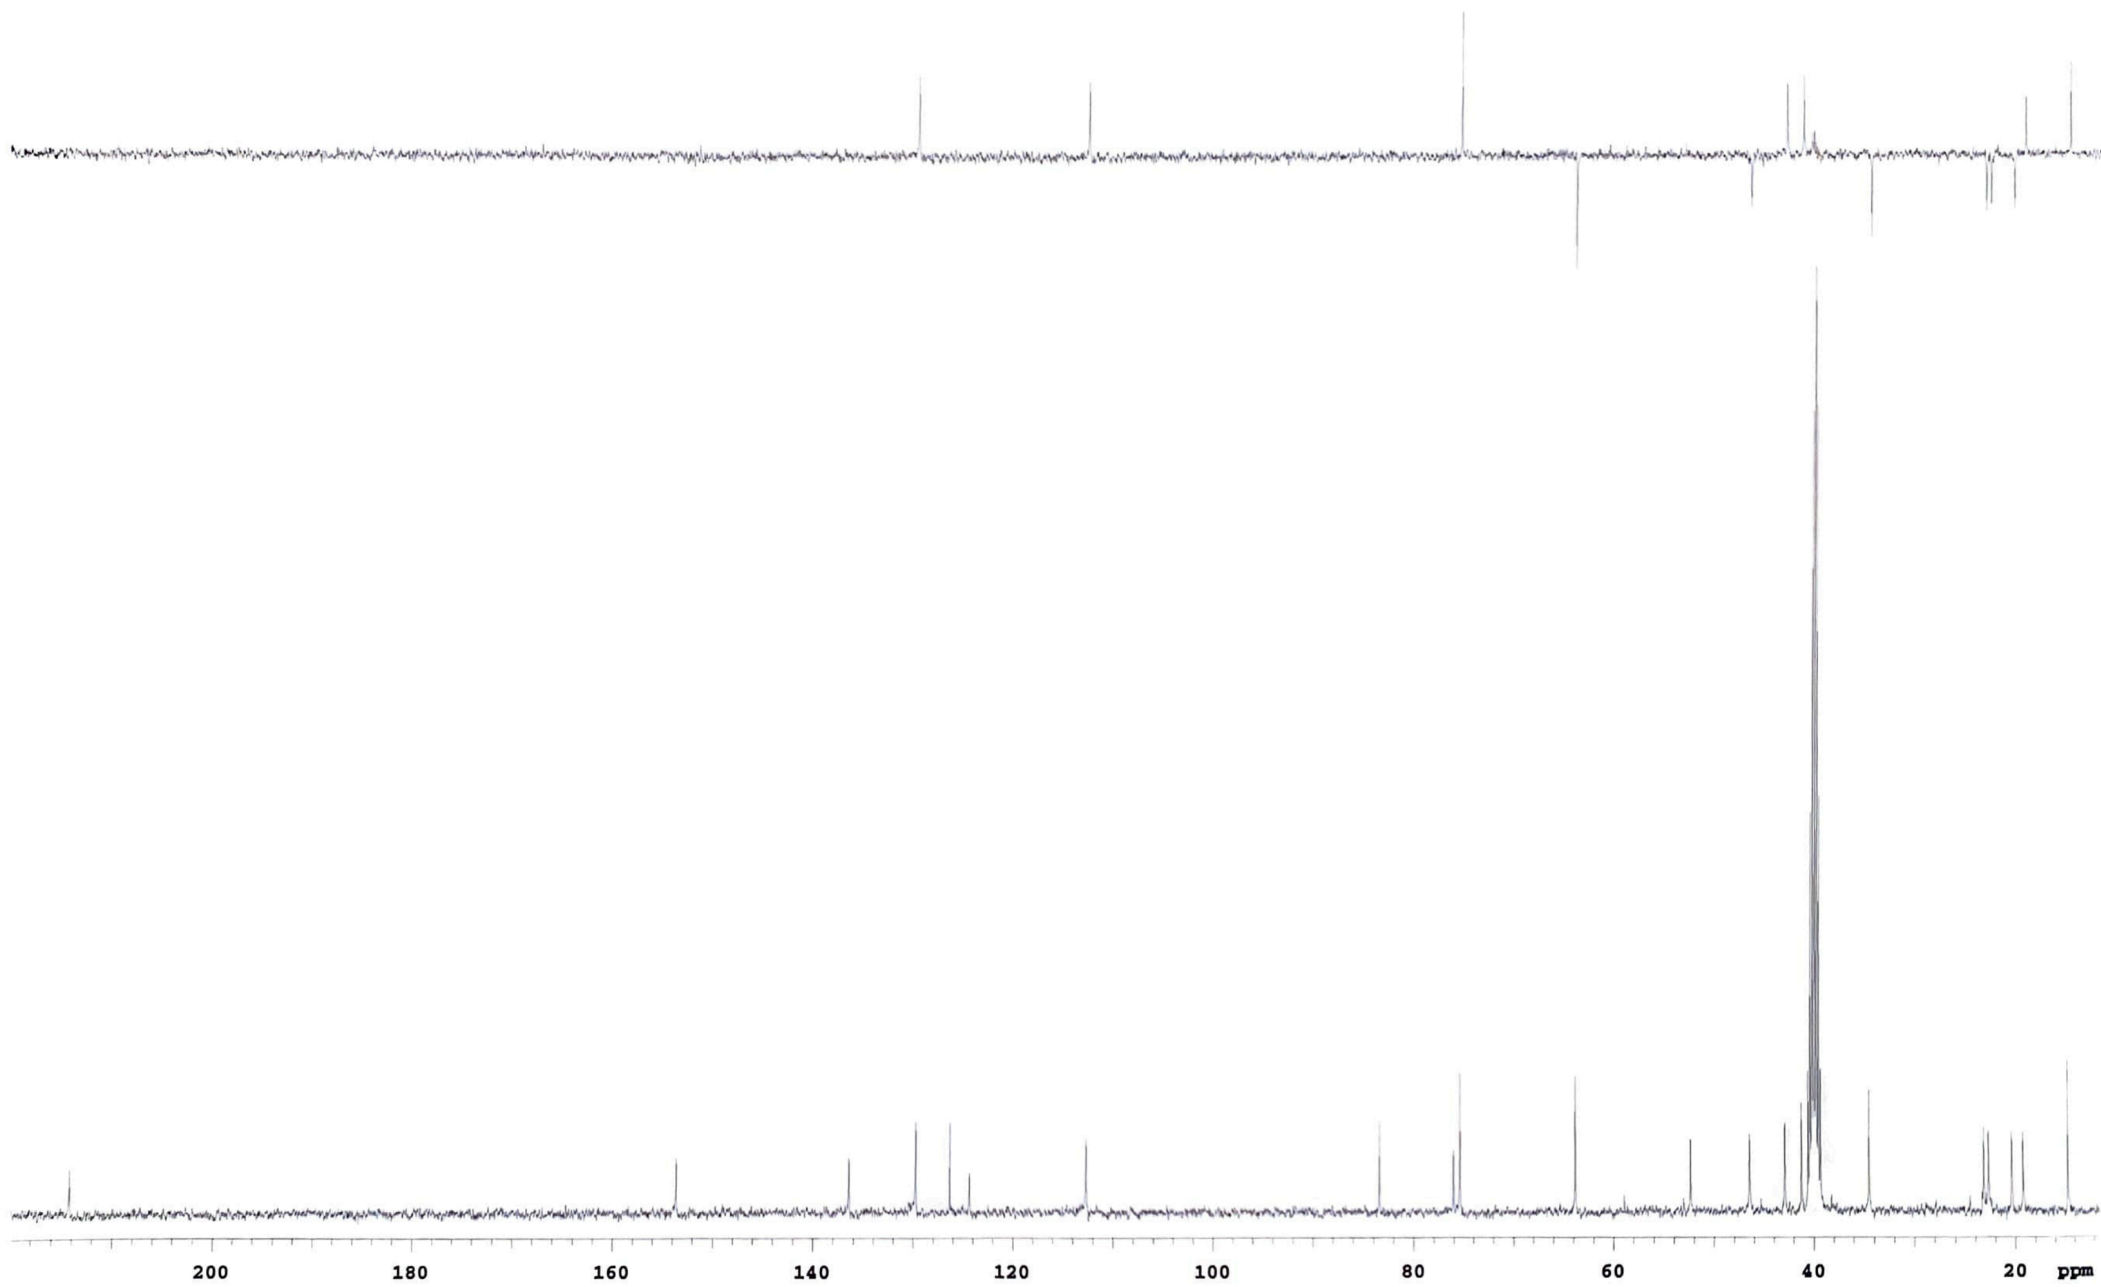

DEPT-NMR product 7

STANDARD 1H OBSERVE

Data Collected on:  
mmr400-mercury400  
Archive directory:  
/export/home/vnmr2/vnmrsys/data  
Sample directory:

File: gcosy

Pulse Sequence: gcosy  
Solvent: DMSO

Relax. delay 1.000 sec  
Acq. time 0.142 sec  
Width 3623.2 Hz  
2D Width 3623.2 Hz  
Single scan  
1024 increments  
OBSERVE H1, 399.9701216 MHz  
DATA PROCESSING  
Sine bell 0.071 sec  
F1 DATA PROCESSING  
Sine bell 0.035 sec  
FT size 4096 x 4096  
Total time 28 min

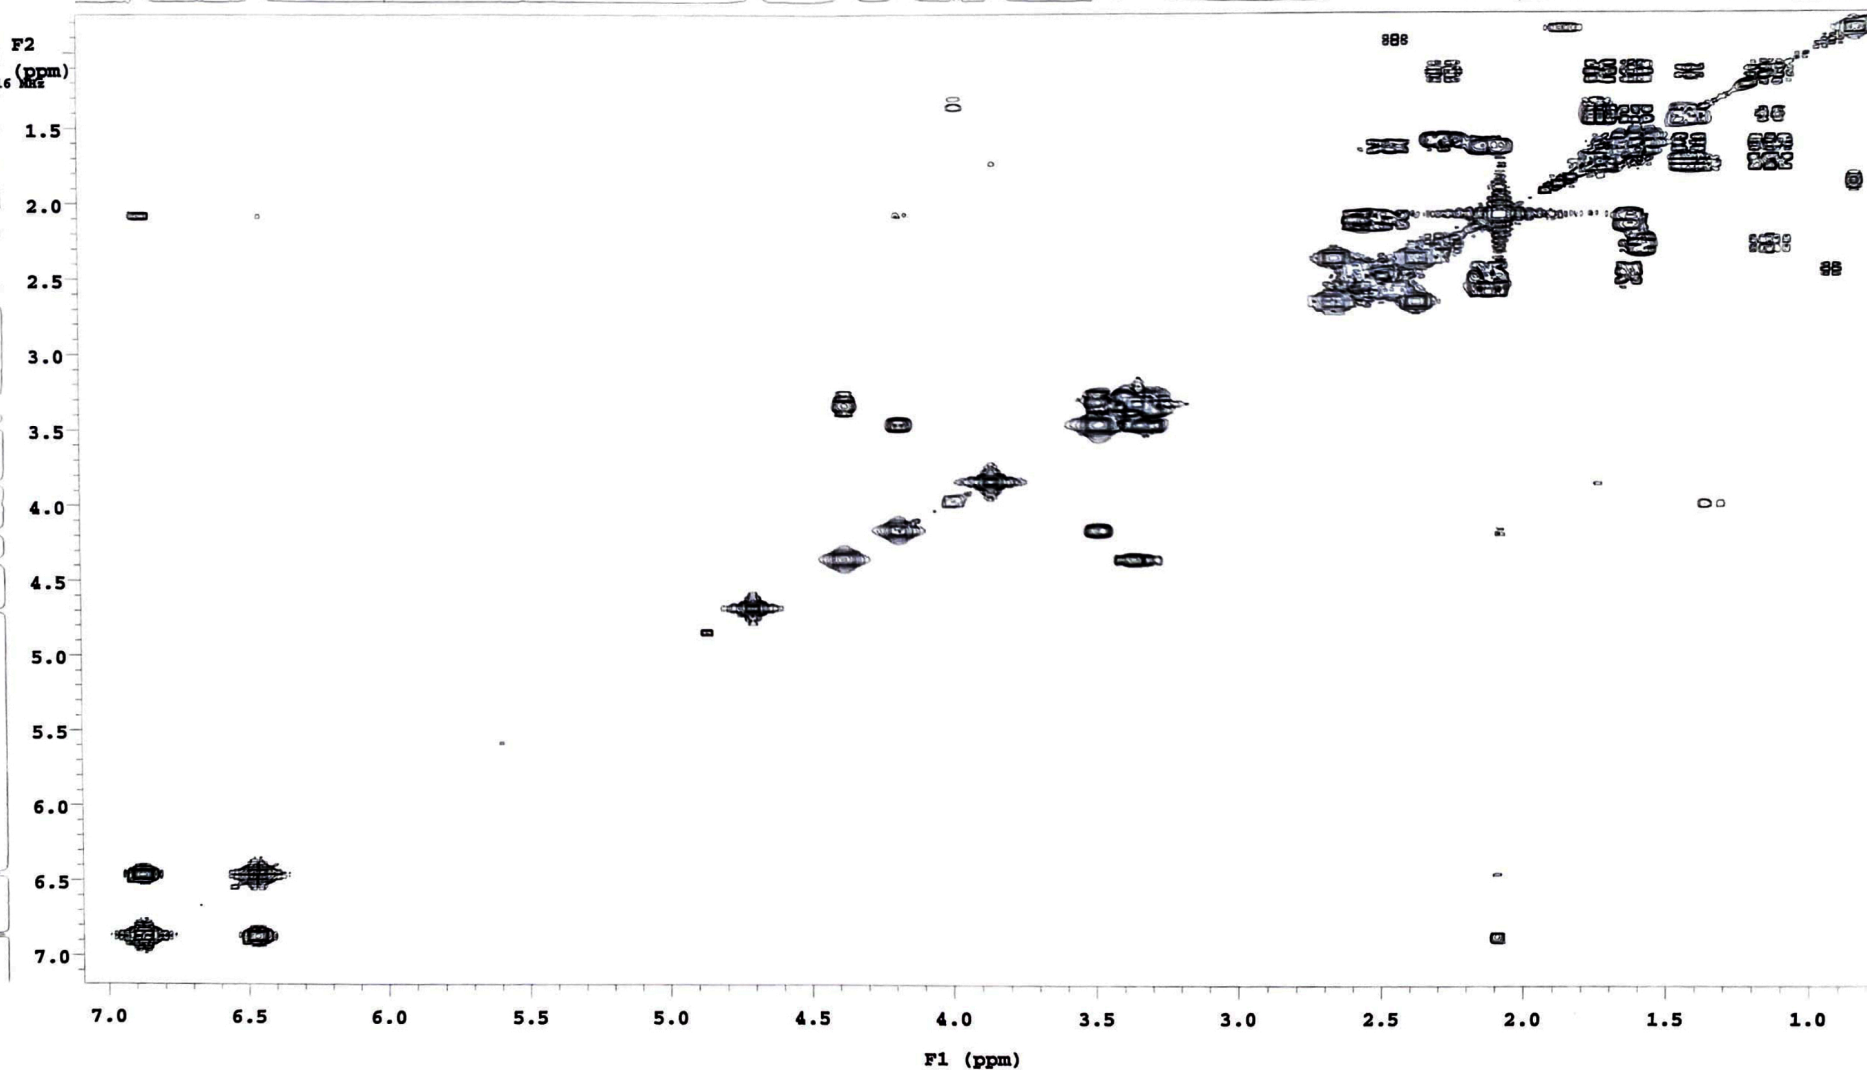

COSY-NMR product 7

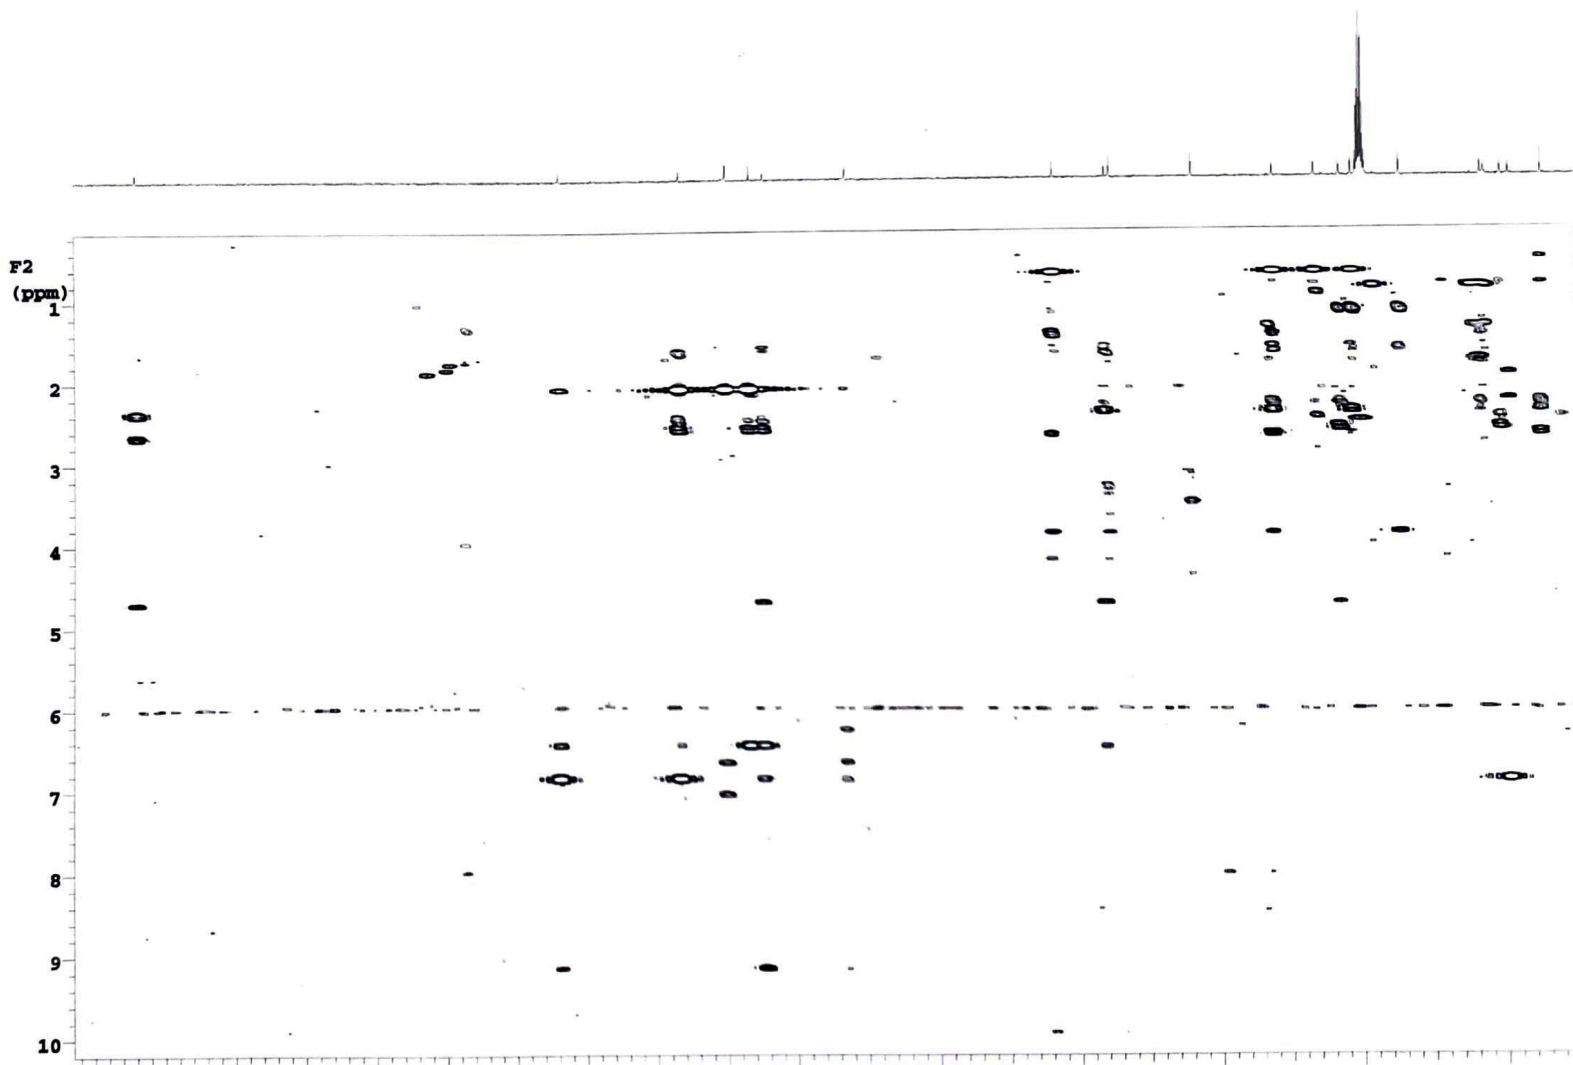

PULSE SEQUENCE: ghmhc  
 Relax. delay 1.000 sec  
 Acq. time 0.150 sec  
 Width 6410.3 Hz  
 2D Width 24154.6 Hz  
 16 repetitions  
 256 increments

OBSERVE H1, 399.9701216

DATA PROCESSING  
 Sine bell 0.075 sec  
 F1 DATA PROCESSING  
 Sine bell 0.005 sec  
 FT size 2048 x 2048  
 Total time 79 minutes

F1 (ppm)

nmr2\_2013-06-05  
 Data Collected on:  
 nmr400-mercury400  
 Archive directory:  
 /export/home/vnmr2/vnmrsys/data  
 Sample directory:  
 nmr400-2013-06-05

HMBC-NMR product 7

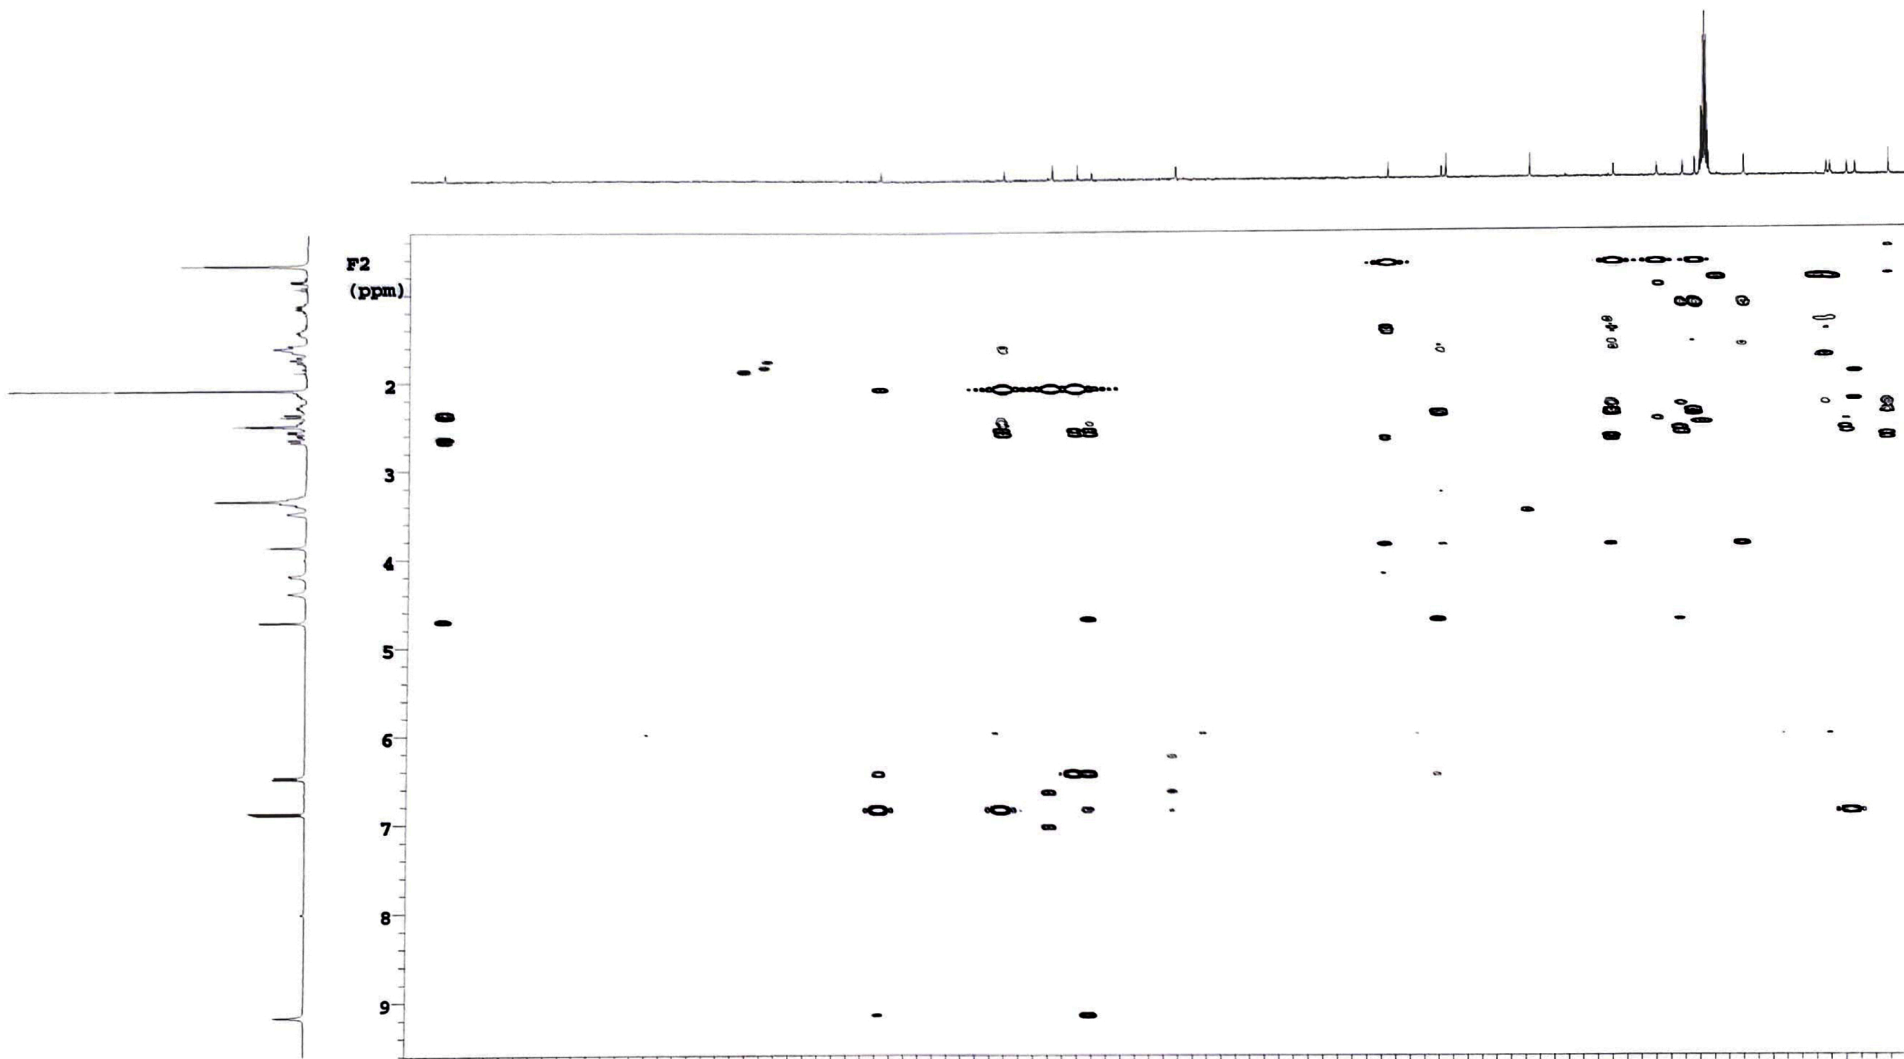

|                                                                                                                                                                                                                         |                                |                                                                                                                                                                                              |                                                                                |                 |                                                                                |                                                                                                                                                                                                                                  |
|-------------------------------------------------------------------------------------------------------------------------------------------------------------------------------------------------------------------------|--------------------------------|----------------------------------------------------------------------------------------------------------------------------------------------------------------------------------------------|--------------------------------------------------------------------------------|-----------------|--------------------------------------------------------------------------------|----------------------------------------------------------------------------------------------------------------------------------------------------------------------------------------------------------------------------------|
| <p>PULSE SEQUENCE: gHMBC<br/>         Relax. delay 1.000 sec<br/>         Acq. time 0.150 sec<br/>         Width 6410.3 Hz<br/>         2D Width 24154.6 Hz<br/>         16 repetitions<br/>         256 increments</p> | <p>OBSERVE H1, 399.9701216</p> | <p>DATA PROCESSING<br/>         Sine bell 0.075 sec<br/>         F1 DATA PROCESSING<br/>         Sine bell 0.005 sec<br/>         FT size 2048 x 2048<br/>         Total time 79 minutes</p> | <p>200<br/>180<br/>160<br/>140<br/>120<br/>100<br/>80<br/>60<br/>40<br/>20</p> | <p>F1 (ppm)</p> | <p>200<br/>180<br/>160<br/>140<br/>120<br/>100<br/>80<br/>60<br/>40<br/>20</p> | <p>vmnr2_2013-06-05<br/>         Data Collected on:<br/>         mxr400-mercury400<br/>         Archive directory:<br/>         /export/home/vmnr2/vmnrays/data<br/>         Sample directory:<br/>         vmnr2_2013-06-05</p> |
|-------------------------------------------------------------------------------------------------------------------------------------------------------------------------------------------------------------------------|--------------------------------|----------------------------------------------------------------------------------------------------------------------------------------------------------------------------------------------|--------------------------------------------------------------------------------|-----------------|--------------------------------------------------------------------------------|----------------------------------------------------------------------------------------------------------------------------------------------------------------------------------------------------------------------------------|

Focused HMBC-NMR product 7



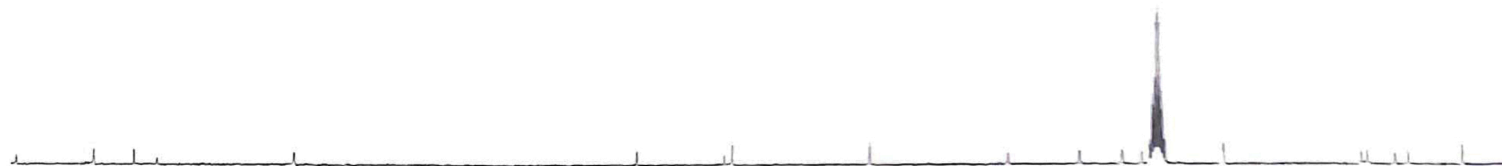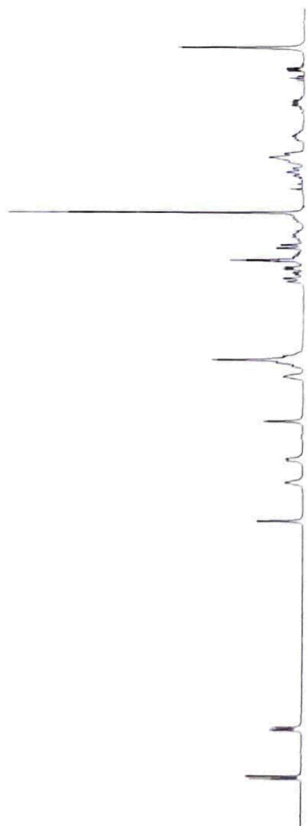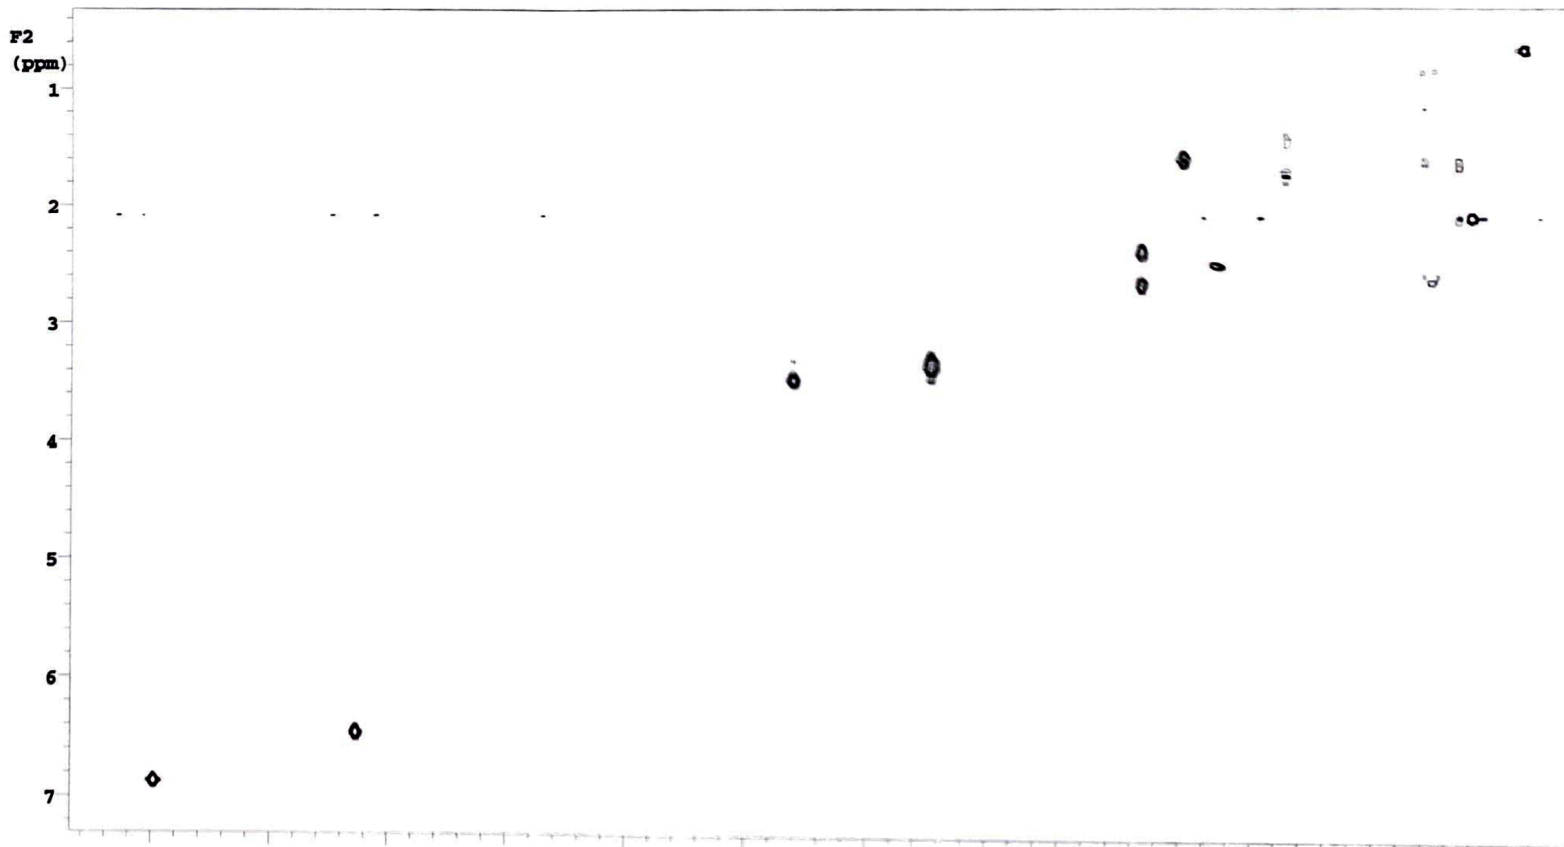

PULSE SEQUENCE: ghmqc  
 Relax. delay 1.000 sec  
 Acq. time 0.150 sec  
 Width 4000.0 Hz  
 2D Width 24154.6 Hz  
 8 repetitions  
 2 x 256 increments

OBSERVE H1, 399.9701216  
 DECOUPLE C13, 100.5831272  
 Power 50 dB  
 on during acquisition  
 off during delay  
 GARP-1 modulated

130 120 110 100 90 80 70 60 50 40 30 20  
 DATA PROCESSING  
 Gauss apodisation 0.069 sec  
 F1 DATA PROCESSING  
 Gauss apodisation 0.020 sec  
 FT size 1024 x 4096  
 Total time 79 minutes

F1 (ppm)

30 20  
 vnmr2\_2013-06-05

Data Collected on:  
 nmr400-mercury400  
 Archive directory:  
 /export/home/vnmr2/vnmrays/data  
 Sample directory:  
 nmr400-2013-06-05

HMQC-NMR product 7

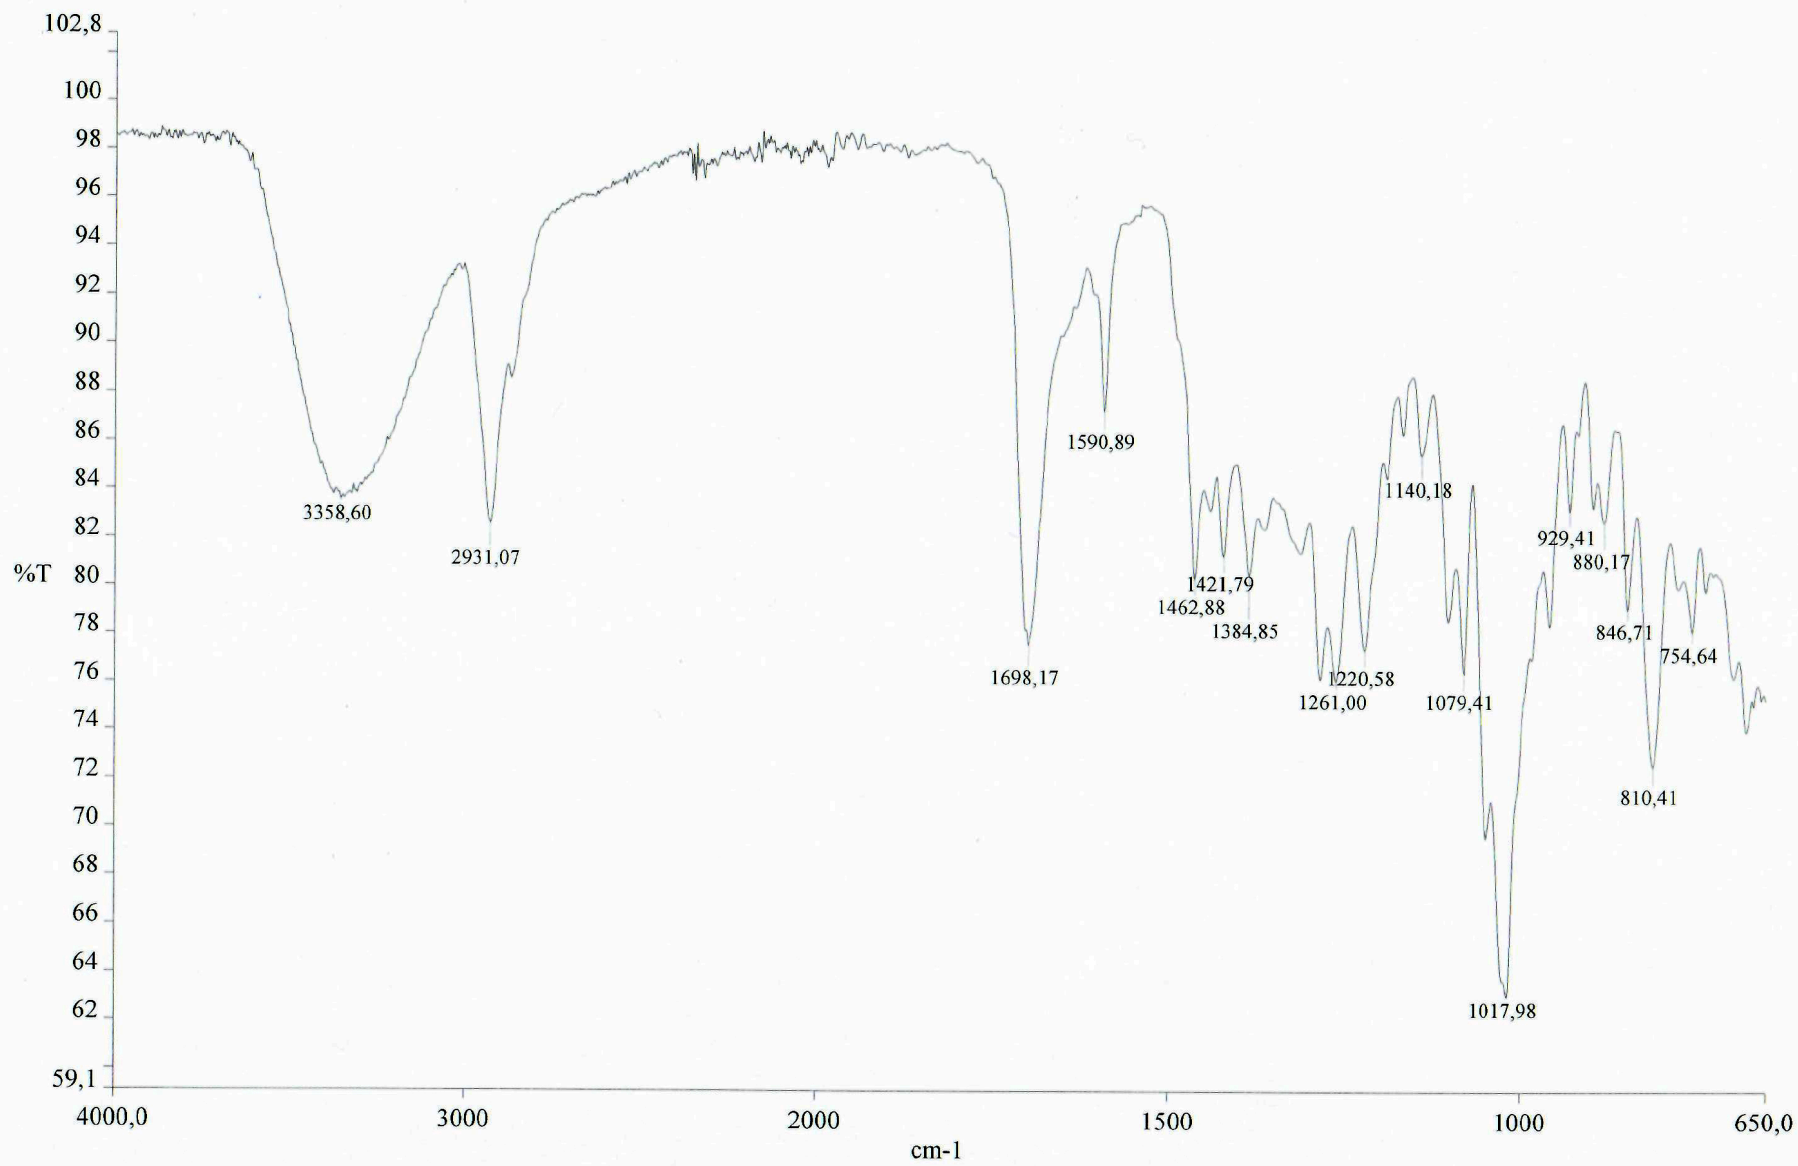

IR product 7

cortisone7 #97-114 RT: 2.75-3.23 AV: 18 NL: 8.62E5  
T: - p ESI Full ms [100.00-2000.00]

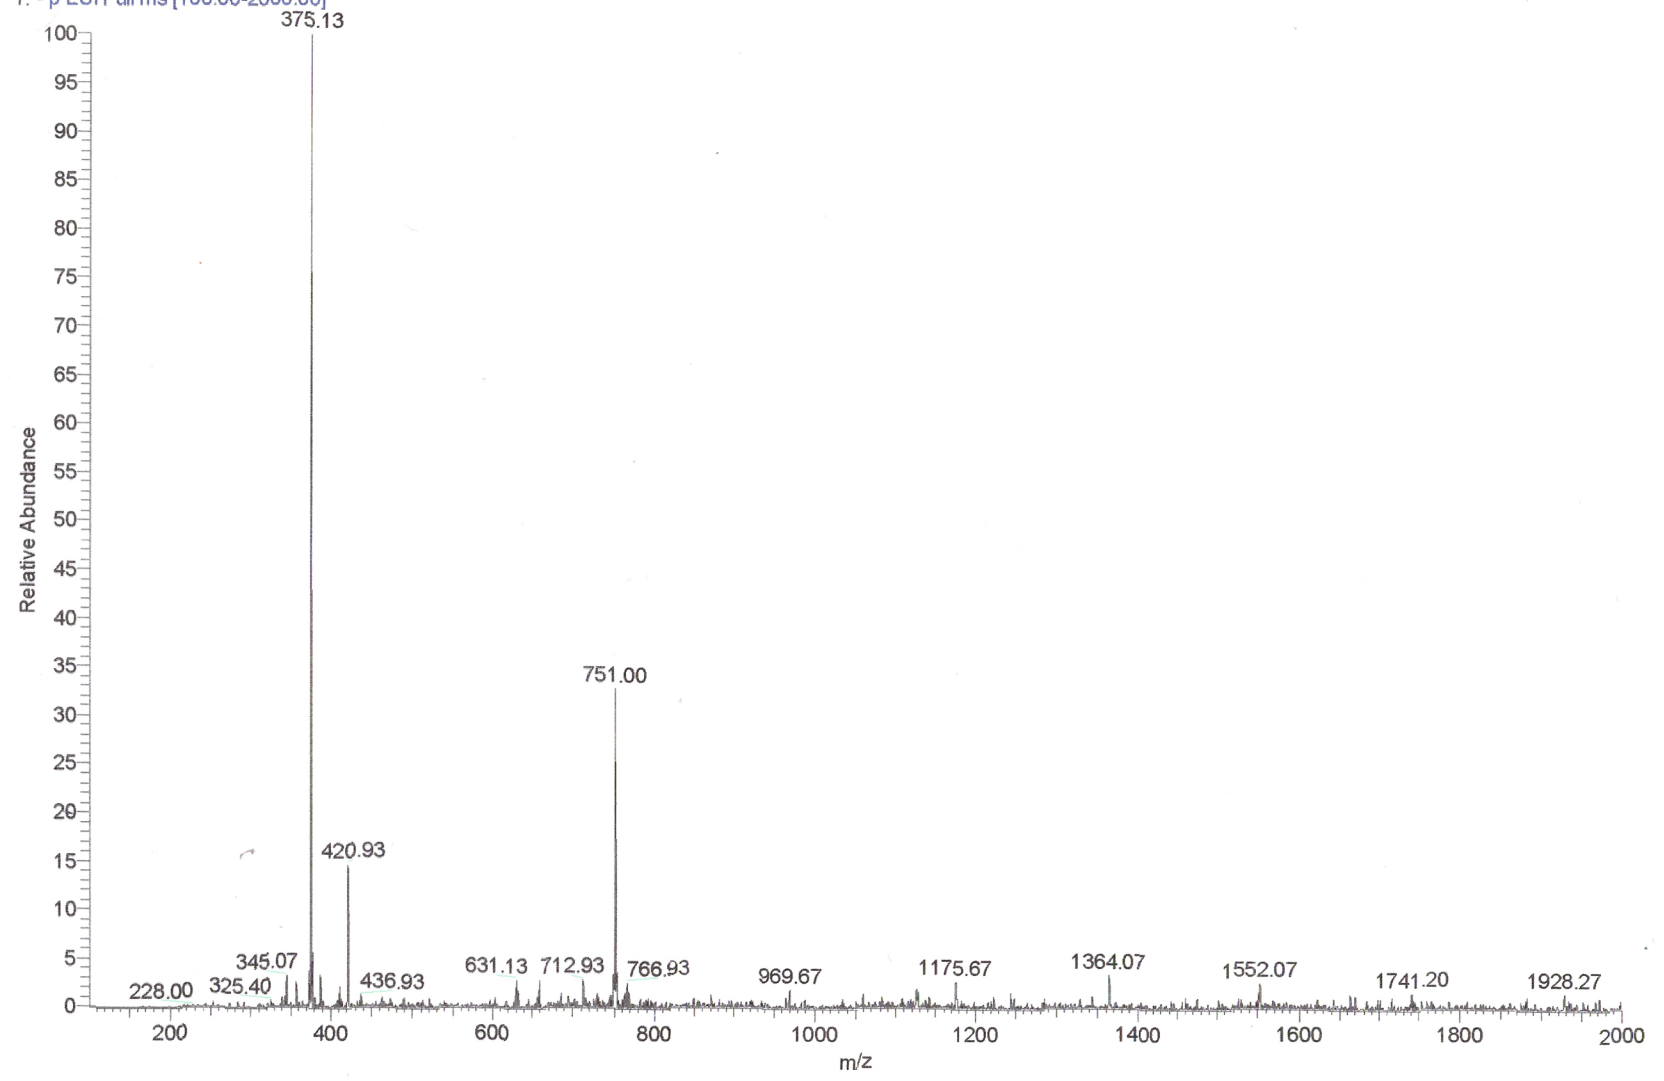

MS product 7
